# Supplementary material for: Predicting reactivity for bioorthogonal cycloadditions involving nitrones
Source: Royal Society of Chemistry journal article supplement (doi:10.1039/d0ra05092j), 2020-01-01
Supplement: d0ra05092j1.pdf [file d0ra05092j1.pdf]

# Supporting Information

## Predicting Reactivity for Bioorthogonal Cycloadditions Involving Nitrones

Masaya Nakajima,<sup>1\*</sup> Didier A. Bilodeau,<sup>2</sup> John Paul Pezacki<sup>2\*</sup>

<sup>1</sup> Graduate School of Pharmaceutical Sciences, Chiba University  
1-8-1, Inohana, Chuo-ku, Chiba, 260-8675, Japan

<sup>2</sup> Department of Chemistry and Biomolecular Sciences, University of Ottawa  
150 Louis-Pasteur, Ottawa, Ontario, Canada, K1N 6N5

Correspondence to: Correspondence to: m.nakajima@chiba-u.jp or john.pezacki@uottawa.ca

### Table of contents

|                                                                                                                                    |    |
|------------------------------------------------------------------------------------------------------------------------------------|----|
| 1. General Computational Methods .....                                                                                             | 2  |
| 2. Cartesian Coordinates and Energies .....                                                                                        | 3  |
| 3. Calculated barriers and distortion energies for selected reactions of nitrones with<br>dipolarophiles (Acetonitrile data) ..... | 32 |

## 1. General Computational methods

All calculations were carried with the Gaussian 16 program package\*. Geometry optimizations were carried out at the M06-2X level of theory with the 6-31G(d) basis set. Solvent effects in methanol and acetonitrile were evaluated at the M06-2X/6-311++G(d,p) level at 298.15K with a self-consistent reaction field (SCRF) using the SMD model on the gas-phase-optimized structures. Harmonic vibrational analysis was performed at the same level of theory as the geometry optimization to confirm no imaginary vibration was observed for the optimized structure and only a single imaginary vibration was observed for the transition state.

D/I analysis was performed based on the following formula:

$$\text{Distortion\_Nitron} = \text{TS\_Nitron} - \text{SM\_Nitron}$$

$$\text{Distortion\_Dipolarophile} = \text{TS\_Dipolarophile} - \text{SM\_Dipolarophile}$$

$$\text{Distortion\_Total} = \text{Dis\_Nitron} + \text{Distortion\_Dipolarophile}$$

$$\text{Interaction} = \text{TS\_Nitron} + \text{TS\_Dipolarophile} - \text{TS\_E}$$

$$\Delta E_{\ddagger} = \text{TS\_E} - (\text{SM\_Nitron} + \text{SM\_Dipolarophile})$$

\* Gaussian 16, Revision B.01, M. J. Frisch, G. W. Trucks, H. B. Schlegel, G. E. Scuseria, M. A. Robb, J. R. Cheeseman, G. Scalmani, V. Barone, G. A. Petersson, H. Nakatsuji, X. Li, M. Caricato, A. V. Marenich, J. Bloino, B. G. Janesko, R. Gomperts, B. Mennucci, H. P. Hratchian, J. V. Ortiz, A. F. Izmaylov, J. L. Sonnenberg, D. Williams-Young, F. Ding, F. Lipparini, F. Egidi, J. Goings, B. Peng, A. Petrone, T. Henderson, D. Ranasinghe, V. G. Zakrzewski, J. Gao, N. Rega, G. Zheng, W. Liang, M. Hada, M. Ehara, K. Toyota, R. Fukuda, J. Hasegawa, M. Ishida, T. Nakajima, Y. Honda, O. Kitao, H. Nakai, T. Vreven, K. Throssell, J. A. Montgomery, Jr., J. E. Peralta, F. Ogliaro, M. J. Bearpark, J. J. Heyd, E. N. Brothers, K. N. Kudin, V. N. Staroverov, T. A. Keith, R. Kobayashi, J. Normand, K. Raghavachari, A. P. Rendell, J. C. Burant, S. S. Iyengar, J. Tomasi, M. Cossi, J. M. Millam, M. Klene, C. Adamo, R. Cammi, J. W. Ochterski, R. L. Martin, K. Morokuma, O. Farkas, J. B. Foresman, and D. J. Fox, Gaussian, Inc., Wallingford CT, 2016.

## 2. Cartesian Coordinates and Energies

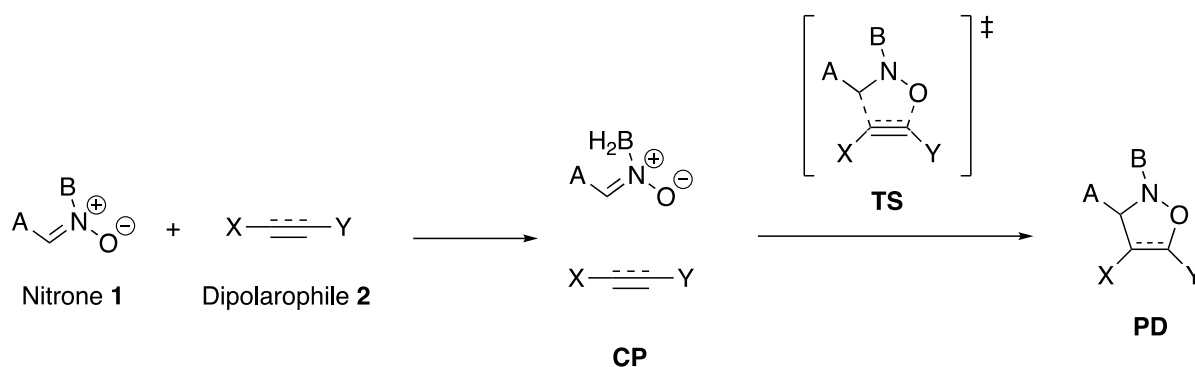

**Scheme S1**

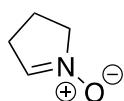

**1a**

1a\_M062X6-31G\*.log  
 Energy (E) = -286.405311664 Hartree  
 Enthalpy (H) = -286.286961 Hartree  
 Gibbs free energy (G) = -286.321649 Hartree  
 Charge = 0, Spin = 1

|   |           |           |           |
|---|-----------|-----------|-----------|
| C | 0.059964  | 1.142209  | -0.032170 |
| H | 0.516814  | 2.120169  | -0.090854 |
| O | 2.082501  | 0.018778  | -0.048167 |
| N | 0.829055  | 0.092552  | -0.007784 |
| C | 0.038662  | -1.162519 | 0.136086  |
| H | 0.468657  | -1.888213 | -0.554315 |
| H | 0.196687  | -1.511823 | 1.160129  |
| C | -1.389645 | 0.796581  | 0.098254  |
| H | -1.764131 | 1.033005  | 1.103113  |
| H | -2.019127 | 1.339625  | -0.612611 |
| C | -1.393846 | -0.728725 | -0.166728 |
| H | -2.130010 | -1.258379 | 0.440049  |
| H | -1.623090 | -0.917749 | -1.218342 |

1a\_M062X6-311++g\*\*\_sp.log  
 E = -179789.57230559012

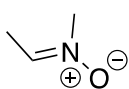

**1b**

1b\_M062X6-31G\*.log

Energy (E) = -248.302979631 Hartree  
 Enthalpy (H) = -248.192607 Hartree  
 Gibbs free energy (G) = -248.228644 Hartree

Charge = 0, Spin = 1

|   |           |           |           |
|---|-----------|-----------|-----------|
| C | 0.662982  | -0.700599 | -0.000039 |
| H | 0.646810  | -1.783607 | -0.000097 |
| O | -1.607915 | -0.826499 | 0.000038  |
| N | -0.523589 | -0.168663 | -0.000024 |
| C | 1.951110  | 0.064736  | 0.000032  |
| H | 2.066462  | 0.698879  | -0.886344 |
| H | 2.065913  | 0.699789  | 0.885813  |
| H | 2.780104  | -0.644938 | 0.000657  |
| C | -0.720240 | 1.291664  | -0.000007 |
| H | -1.307231 | 1.525290  | 0.888059  |
| H | 0.221425  | 1.837396  | -0.000614 |
| H | -1.308154 | 1.525026  | -0.887524 |

1b\_M062X6-311++g\*\*\_sp.log  
 E = -155875.3196361777

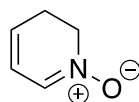

**1c**

1c\_M062X6-31G\*.log  
 Energy (E) = -324.481832180 Hartree  
 Enthalpy (H) = -324.357515 Hartree  
 Gibbs free energy (G) = -324.393577 Hartree

Charge = 0, Spin = 1

|   |           |          |          |
|---|-----------|----------|----------|
| C | -1.820792 | 0.131460 | 0.022223 |
|---|-----------|----------|----------|

C -1.084925 1.247975 0.096069  
 C 0.358747 1.217043 -0.065119  
 N 1.023500 0.090886 -0.002737  
 C 0.283104 -1.161522 0.315923  
 C -1.121219 -1.169145 -0.269295  
 O 2.273557 -0.023395 -0.105677  
 H -2.901420 0.157609 0.111410  
 H -1.540607 2.220632 0.250166  
 H 0.963159 2.100947 -0.220435  
 H 0.261295 -1.218980 1.409859  
 H 0.913837 -1.960899 -0.069276  
 H -1.667823 -2.022880 0.141546  
 H -1.070883 -1.320338 -1.357492  
 1c\_M062X6-311++g\*\*\_sp.log  
 E = -203688.17244651137

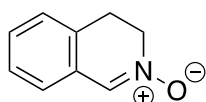

**1d**

1d\_M062X6-31G\*.log  
 Energy (E) = -478.082876078 Hartree  
 Enthalpy (H) = -477.908221 Hartree  
 Gibbs free energy (G) = -477.950257 Hartree  
 Charge = 0, Spin = 1  
 C -0.547640 0.765681 -0.108407  
 C -0.327054 -0.622275 -0.088529  
 C 1.031328 -1.136097 -0.179492  
 N 2.077342 -0.378451 0.026717  
 C 1.877230 1.049677 0.394121  
 C 0.662944 1.642629 -0.302054  
 O 3.273517 -0.775401 0.008777  
 C -1.842754 1.257922 -0.011510  
 C -2.925635 0.386252 0.096434  
 C -2.709603 -0.989845 0.101508  
 C -1.416934 -1.493326 0.009273  
 H 1.248135 -2.179414 -0.373870  
 H 2.809648 1.537551 0.114997  
 H 1.773857 1.070646 1.484154  
 H 0.877144 1.731473 -1.375853  
 H 0.484034 2.653748 0.075646  
 H -2.006914 2.332484 -0.026649  
 H -3.933675 0.780763 0.173113  
 H -3.549390 -1.672679 0.181890  
 H -1.243663 -2.565916 0.021273  
 1d\_M062X6-311++g\*\*\_sp.log

E = -300098.48410381126

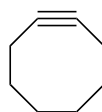

**2a**

2a\_M062X6-31G\*.log  
 Energy (E) = -311.848085077 Hartree  
 Enthalpy (H) = -311.656524 Hartree  
 Gibbs free energy (G) = -311.696727 Hartree  
 Charge = 0, Spin = 1  
 C 1.854065 0.580397 0.283751  
 C 1.958221 -0.908630 -0.123907  
 C 0.604142 -1.455012 -0.032129  
 C -0.601462 -1.454317 0.031577  
 C -1.956459 -0.910825 0.124224  
 C -1.855565 0.578385 -0.283288  
 H 2.800945 1.071079 0.029988  
 H 1.752671 0.637500 1.374002  
 H 2.675261 -1.433721 0.515275  
 H 2.325067 -0.990717 -1.154205  
 H -2.322229 -0.993664 1.154857  
 H -2.672928 -1.437316 -0.514464  
 H -2.802944 1.067403 -0.028217  
 H -1.755509 0.636117 -1.373620  
 C -0.684998 1.345032 0.372633  
 H -0.545505 0.973781 1.396241  
 H -1.004473 2.387675 0.475632  
 C 0.682841 1.345178 -0.373151  
 H 1.001305 2.387993 -0.477424  
 H 0.543622 0.972628 -1.396321  
 2a\_M062X6-311++g\*\*\_sp.log  
 E = -195748.27997587435

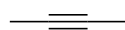

**2b**

2b\_M062X6-31G\*.log  
 Energy (E) = -155.894169481 Hartree  
 Enthalpy (H) = -155.801865 Hartree  
 Gibbs free energy (G) = -155.837071 Hartree  
 Charge = 0, Spin = 1  
 C 2.066512 -0.000067 0.000039  
 C 0.603022 0.000108 -0.000074

C -0.603026 0.000202 -0.000112  
 C -2.066507 -0.000065 0.000052  
 H 2.458416 1.014429 0.118144  
 H 2.458159 -0.609636 0.819672  
 H -2.458670 1.017501 0.086412  
 H -2.457993 -0.583859 0.838274  
 H -2.458313 -0.434332 -0.924397  
 H 2.458394 -0.405175 -0.937537  
 2b\_M062X6-311++g\*\*\_sp.log  
 E = -97858.42176730659

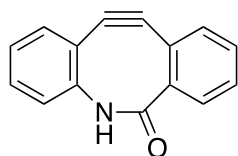

**2c**

2c\_M062X6-31G\*.log  
 Energy (E) = -706.625204740 Hartree  
 Enthalpy (H) = -706.411736 Hartree  
 Gibbs free energy (G) = -706.465130 Hartree  
 Charge = 0, Spin = 1  
 C 1.875248 0.480629 -0.038921  
 C 1.965334 -0.924029 -0.143438  
 C 0.709342 -1.547914 -0.348191  
 C -0.498295 -1.527755 -0.379099  
 C -1.789415 -0.977814 -0.169258  
 C -1.813564 0.423414 -0.002671  
 C -0.678305 1.424208 -0.221928  
 N 0.723067 1.273379 -0.275746  
 C 3.053107 1.190579 0.225145  
 C 4.270050 0.536449 0.372200  
 C 4.348436 -0.850256 0.264115  
 C 3.191915 -1.573203 0.009793  
 C -2.956440 -1.734884 -0.054378  
 C -4.161023 -1.115819 0.253948  
 C -4.197701 0.261865 0.444845  
 C -3.039006 1.020007 0.305436  
 O -1.035049 2.578899 -0.400627  
 H 1.021256 2.230268 -0.437591  
 H 3.010532 2.272575 0.318707  
 H 5.162091 1.119944 0.576238  
 H 5.298518 -1.359983 0.380124  
 H 3.216302 -2.654520 -0.073857  
 H -2.899671 -2.808297 -0.198443  
 H -5.065481 -1.708177 0.349285  
 H -5.131983 0.754592 0.693095

H -3.070740 2.095901 0.422087  
 2c\_M062X6-311++g\*\*\_sp.log  
 E = -443541.5055930105

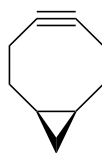

**2d**

2d\_M062X6-31G\*.log  
 Energy (E) = -349.915636731 Hartree  
 Enthalpy (H) = -349.718297 Hartree  
 Gibbs free energy (G) = -349.758963 Hartree  
 Charge = 0, Spin = 1  
 C 1.661031 0.293448 0.479432  
 C 1.932041 -1.144131 -0.032749  
 C 0.608001 -1.760676 -0.153845  
 C -0.600044 -1.763479 -0.149927  
 C -1.926859 -1.152464 -0.032865  
 C -1.663096 0.286768 0.478583  
 C -0.760333 1.094237 -0.436561  
 C 0.755755 1.097280 -0.436447  
 C -0.004688 2.290131 0.076318  
 H 2.613635 0.827319 0.590815  
 H 1.216455 0.221634 1.478688  
 H 2.585381 -1.680360 0.663105  
 H 2.444831 -1.114590 -1.001407  
 H -2.580475 -1.690512 0.661324  
 H -2.436493 -1.125779 -1.003282  
 H -1.219737 0.218014 1.478597  
 H -2.618314 0.816313 0.588081  
 H -1.181625 1.215760 -1.433897  
 H 1.177016 1.220068 -1.433633  
 H -0.006610 3.212645 -0.494728  
 H -0.004908 2.432811 1.154706  
 2d\_M062X6-311++g\*\*\_sp.log  
 E = -219643.13394484657

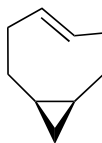

**2e**

2e\_M062X6-31G\*.log  
 Energy (E) = -351.149066433 Hartree

Enthalpy (H) = -350.928175 Hartree  
Gibbs free energy (G) = -350.968721  
Hartree

Charge = 0, Spin = 1

C -0.215313 -1.635119 -0.549598  
C 1.218404 -1.814148 0.026817  
C 1.577400 -0.453793 0.555671  
C 1.711511 0.585930 -0.264989  
C 1.057438 1.893011 0.061944  
C -0.422915 1.688593 -0.368014  
C -1.194510 0.675184 0.466430  
C -1.126634 -0.841890 0.374418  
C -2.334442 -0.108205 -0.133162  
H -0.675988 -2.607214 -0.767957  
H -0.126261 -1.102346 -1.504534  
H 1.893493 -2.147441 -0.769096  
H 1.227452 -2.576422 0.812731  
H 1.318419 -0.255285 1.596279  
H 1.897891 0.399021 -1.325748  
H 1.484414 2.749549 -0.469625  
H 1.102925 2.100971 1.137741  
H -0.436306 1.385909 -1.423517  
H -0.960841 2.644151 -0.318667  
H -1.368943 1.025428 1.483382  
H -1.265286 -1.324570 1.341872  
H -3.274137 -0.187054 0.403620  
H -2.442470 -0.042078 -1.213585  
2e\_M062X6-311++g\*\*\_sp.log  
E = -220415.35903410387

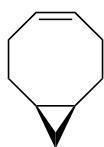

**2f**

2f\_M062X6-31G\*.log  
Energy (E) = -351.161979936 Hartree  
Enthalpy (H) = -350.940313 Hartree  
Gibbs free energy (G) = -350.981930  
Hartree  
Charge = 0, Spin = 1  
C 0.433765 -1.516575 0.542233  
C -0.997524 -1.789260 0.090748  
C -1.965952 -0.669480 -0.205364  
C -1.966251 0.668835 -0.205706  
C -0.998358 1.788977 0.090653  
C 0.432818 1.516477 0.542543

C 1.243207 0.751345 -0.474900  
C 1.243648 -0.750803 -0.475133  
C 2.475532 0.000565 -0.053038  
H 0.916806 -2.484702 0.725889  
H 0.434743 -0.996850 1.505460  
H -1.481699 -2.432538 0.838810  
H -0.955079 -2.407673 -0.818762  
H -2.927253 -1.093111 -0.502388  
H -2.927721 1.091919 -0.502940  
H -1.482972 2.431930 0.838711  
H -0.955782 2.407596 -0.818705  
H 0.433553 0.996242 1.505493  
H 0.915624 2.484595 0.726848  
H 1.283912 1.224840 -1.454250  
H 1.284470 -1.224119 -1.454561  
H 3.339255 0.000971 -0.709154  
H 2.716830 0.000409 1.007327  
2f\_M062X6-311++g\*\*\_sp.log  
E = -220424.1443523167

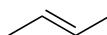

**2g**

2g\_M062X6-31G\*.log  
Energy (E) = -157.132134884 Hartree  
Enthalpy (H) = -157.016200 Hartree  
Gibbs free energy (G) = -157.049995  
Hartree  
Charge = 0, Spin = 1  
C -1.956345 -0.078518 -0.000025  
C -0.533805 0.397396 0.000055  
C 0.533905 -0.397544 0.000033  
C 1.956273 0.078588 -0.000025  
H -2.005845 -1.171107 0.000308  
H -2.497163 0.287493 0.880013  
H -0.381779 1.477798 0.000054  
H 0.381770 -1.477919 0.000073  
H 2.497208 -0.287330 0.879991  
H 2.005530 1.171206 0.000403  
H -2.496791 0.286902 -0.880532  
H 2.496906 -0.286575 -0.880538  
2g\_M062X6-311++g\*\*\_sp.log  
E = -98633.87235962052

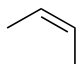

**2h**

2h\_M062X6-31G\*.log  
 Energy (E) = -157.130297616 Hartree  
 Enthalpy (H) = -157.014151 Hartree  
 Gibbs free energy (G) = -157.048426 Hartree  
 Charge = 0, Spin = 1

C 0.666971 0.666610 -0.000086  
 C -0.666851 0.666521 0.000021  
 H 1.168506 1.633576 -0.000020  
 H -1.168571 1.633415 0.000271  
 C 1.581406 -0.523780 -0.000001  
 H 2.236249 -0.508224 -0.878512  
 H 2.233086 -0.510494 0.880934  
 H 1.040319 -1.471862 -0.002036  
 C -1.581436 -0.523724 -0.000026  
 H -1.040709 -1.472007 -0.003728  
 H -2.232275 -0.511147 0.881535  
 H -2.237145 -0.507015 -0.877894

2h\_M062X6-311++g\*\*\_sp.log  
 E = -98632.86874899197

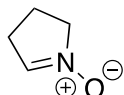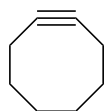

**CP1**

CP1\_M062X6-31G\*.log  
 Energy (E) = -598.269253349 Hartree  
 Enthalpy (H) = -597.957284 Hartree  
 Gibbs free energy (G) = -598.015158 Hartree  
 Charge = 0, Spin = 1

C 1.434906 -1.955527 0.037984  
 C 0.571405 -1.599436 -1.194932  
 C 0.495703 -0.137479 -1.220044  
 C 0.769673 1.013713 -0.967762  
 C 1.494051 2.112588 -0.323885  
 C 2.821281 1.519191 0.202306  
 H 1.679711 -3.022151 -0.021879  
 H 0.804547 -1.831159 0.926076

H -0.408276 -2.077183 -1.095492  
 H 1.042841 -1.962787 -2.115977  
 H 0.906546 2.506441 0.516865  
 H 1.686959 2.952622 -0.999011  
 H 3.299708 2.271530 0.840403  
 H 3.491362 1.357279 -0.650259  
 C 2.672197 0.196057 0.986132  
 H 1.743690 0.226703 1.572742  
 H 3.481830 0.174548 1.723620  
 C 2.736476 -1.136328 0.182069  
 H 3.465376 -1.782490 0.682870  
 H 3.151203 -0.940269 -0.815832  
 C -2.678317 -0.396734 -0.661976  
 H -2.977939 -1.159572 -1.368278  
 O -1.807317 -1.927926 0.835176  
 N -2.100199 -0.762590 0.440532  
 C -1.710202 0.396165 1.283427  
 H -2.083515 0.195436 2.288701  
 H -0.617650 0.400222 1.296881  
 C -2.753106 1.085401 -0.818490  
 H -2.050550 1.415468 -1.592770  
 H -3.752163 1.427906 -1.104427  
 C -2.332100 1.605193 0.580835  
 H -1.628173 2.436153 0.504450  
 H -3.207389 1.956017 1.132187  
 CP1\_M062X6-311++g\*\*\_sp.log  
 E = -375542.7368557001

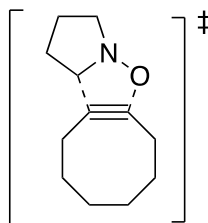

**TS1**

TS1\_M062X6-31G\*.log  
 Energy (E) = -598.250471748 Hartree  
 Enthalpy (H) = -597.939791 Hartree  
 Gibbs free energy (G) = -597.994481 Hartree  
 Charge = 0, Spin = 1  
 Imaginary frequency: -364.9696  
 C 2.717029 -1.546443 0.535241  
 C 1.371488 -1.928668 -0.102064  
 C 0.497626 -0.753257 -0.191264  
 C 0.211110 0.449254 -0.185327

|   |           |           |           |
|---|-----------|-----------|-----------|
| C | 0.636358  | 1.854009  | -0.023754 |
| C | 2.141684  | 2.009304  | -0.292049 |
| H | 3.388341  | -2.409258 | 0.451099  |
| H | 2.568233  | -1.373101 | 1.608342  |
| H | 0.886493  | -2.729921 | 0.464408  |
| H | 1.531018  | -2.322526 | -1.114222 |
| H | 0.416181  | 2.185015  | 1.001324  |
| H | 0.073349  | 2.526512  | -0.686092 |
| H | 2.416794  | 3.050858  | -0.085121 |
| H | 2.328868  | 1.843176  | -1.360007 |
| C | 3.040358  | 1.069923  | 0.534301  |
| H | 2.587260  | 0.921743  | 1.523955  |
| H | 3.981134  | 1.600848  | 0.716284  |
| C | 3.393176  | -0.308871 | -0.085258 |
| H | 4.475717  | -0.446667 | 0.009556  |
| H | 3.188392  | -0.291179 | -1.164072 |
| C | -1.936906 | 0.420009  | -0.898604 |
| H | -1.541183 | 0.567683  | -1.893980 |
| O | -1.295494 | -1.752373 | -0.762376 |
| N | -2.096541 | -0.812178 | -0.450501 |
| C | -2.738541 | -0.814513 | 0.873700  |
| H | -3.310677 | -1.735215 | 0.993133  |
| H | -1.924264 | -0.792932 | 1.609526  |
| C | -2.794309 | 1.389153  | -0.134616 |
| H | -2.161239 | 2.107691  | 0.399274  |
| H | -3.465470 | 1.965444  | -0.778192 |
| C | -3.565307 | 0.470131  | 0.847456  |
| H | -3.678493 | 0.913965  | 1.837713  |
| H | -4.563313 | 0.261897  | 0.453013  |

TS1\_M062X6-311++g\*\*\_sp.log  
E = -375528.0359818919

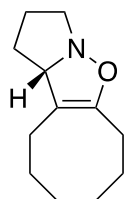

**PD1**

PD1\_M062X6-31G\*.log  
Energy (E) = -598.354535313 Hartree  
Enthalpy (H) = -598.040302 Hartree  
Gibbs free energy (G) = -598.091318 Hartree  
Charge = 0, Spin = 1

|   |          |           |          |
|---|----------|-----------|----------|
| C | 2.529064 | -1.261015 | 0.707793 |
| C | 1.177863 | -1.916181 | 0.422585 |

|   |           |           |           |
|---|-----------|-----------|-----------|
| C | 0.096158  | -0.967038 | 0.021243  |
| C | -0.065345 | 0.354569  | 0.118287  |
| C | 0.823655  | 1.436464  | 0.665070  |
| C | 1.942289  | 1.876914  | -0.301073 |
| H | 3.228332  | -2.058479 | 0.979697  |
| H | 2.451481  | -0.624861 | 1.595896  |
| H | 0.840491  | -2.496089 | 1.291089  |
| H | 1.285616  | -2.636784 | -0.398345 |
| H | 1.258561  | 1.155033  | 1.630322  |
| H | 0.187079  | 2.304950  | 0.875811  |
| H | 2.200415  | 2.921995  | -0.092007 |
| H | 1.550275  | 1.851677  | -1.326160 |
| C | 3.231825  | 1.054968  | -0.229273 |
| H | 3.697541  | 1.205805  | 0.754998  |
| H | 3.932256  | 1.471633  | -0.962913 |
| C | 3.096591  | -0.452602 | -0.480810 |
| H | 4.089705  | -0.841126 | -0.729560 |
| H | 2.474459  | -0.615589 | -1.370706 |
| C | -1.371035 | 0.694375  | -0.570066 |
| H | -1.195660 | 1.209223  | -1.525215 |
| O | -0.937678 | -1.603920 | -0.629193 |
| N | -1.980632 | -0.641850 | -0.828910 |
| C | -2.982374 | -0.844081 | 0.229293  |
| H | -3.665452 | -1.647936 | -0.053256 |
| H | -2.491848 | -1.105275 | 1.179419  |
| C | -2.405045 | 1.462797  | 0.287879  |
| H | -2.015004 | 1.599093  | 1.302437  |
| H | -2.633331 | 2.451099  | -0.117596 |
| C | -3.628285 | 0.531722  | 0.319145  |
| H | -4.237575 | 0.654087  | 1.217190  |
| H | -4.263661 | 0.700502  | -0.555625 |

PD1\_M062X6-311++g\*\*\_sp.log  
E = -375586.0522237863

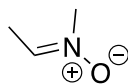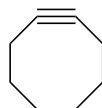

**CP2**

CP2\_M062X6-31G\*.log  
Energy (E) = -560.165043536 Hartree  
Enthalpy (H) = -559.861163 Hartree  
Gibbs free energy (G) = -559.920789 Hartree



Charge = 0, Spin = 1  
 C 1.318637 -2.189393 -0.200349  
 C 0.116177 -1.862954 0.721729  
 C 0.361600 -0.519570 1.251636  
 C 0.848672 0.581359 1.370055  
 C 1.790381 1.675581 1.116494  
 C 2.425014 1.409243 -0.270328  
 H 1.042571 -3.047368 -0.823248  
 H 2.164475 -2.510553 0.419221  
 H 0.032879 -2.610530 1.517136  
 H -0.830729 -1.889382 0.167416  
 H 2.569235 1.677629 1.888727  
 H 1.319562 2.664777 1.139739  
 H 3.294337 2.068297 -0.378059  
 H 1.710945 1.705071 -1.048677  
 C 2.849115 -0.056249 -0.509464  
 H 3.237299 -0.469440 0.430298  
 H 3.699397 -0.036643 -1.199657  
 C 1.776305 -1.019571 -1.099761  
 H 2.185465 -1.454192 -2.018084  
 H 0.892522 -0.443911 -1.407647  
 C -1.836569 0.429982 -1.192068  
 H -1.694818 -0.273609 -2.004425  
 O -2.935620 -1.260213 -0.145756  
 N -2.506990 -0.060945 -0.194906  
 C -1.276351 1.815921 -1.243872  
 H -2.055345 2.586675 -1.278856  
 H -0.628799 2.017464 -0.382744  
 H -0.671921 1.920048 -2.147427  
 C -2.804692 0.725820 1.012689  
 H -2.228391 0.284698 1.826519  
 H -2.543779 1.775335 0.889922  
 H -3.870754 0.602941 1.199679  
 CP2\_M062X6-311++g\*\*\_sp.log  
 E = -351628.1227706481

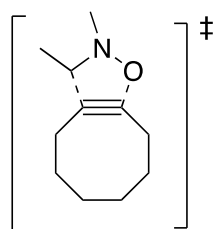

**TS2**

TS2\_M062X6-31G\*.log  
 Energy (E) = -560.151019629 Hartree  
 Enthalpy (H) = -559.848318 Hartree

Gibbs free energy (G) = -559.904271  
 Hartree  
 Charge = 0, Spin = 1  
 Imaginary frequency: -320.1318  
 C 2.431640 -1.662441 0.339202  
 C 1.040854 -1.925681 -0.262026  
 C 0.231272 -0.703093 -0.216454  
 C 0.003183 0.505300 -0.116113  
 C 0.492894 1.880777 0.102364  
 C 1.999638 1.977486 -0.190114  
 H 3.056142 -2.543078 0.147674  
 H 2.340001 -1.578432 1.429301  
 H 0.538381 -2.744596 0.261940  
 H 1.136202 -2.243678 -1.308354  
 H 0.303512 2.173098 1.144868  
 H -0.046433 2.608494 -0.518466  
 H 2.335011 2.984655 0.086375  
 H 2.154986 1.883092 -1.271813  
 C 2.862195 0.929898 0.539690  
 H 2.413323 0.718141 1.519486  
 H 3.830108 1.396892 0.751897  
 C 3.137084 -0.405160 -0.203935  
 H 4.215634 -0.592332 -0.163832  
 H 2.893625 -0.290430 -1.268581  
 C -2.244955 0.559197 -0.646496  
 H -1.904249 0.605517 -1.672727  
 O -1.679100 -1.599535 -0.698540  
 N -2.404713 -0.667821 -0.196014  
 C -2.901368 1.750910 -0.017863  
 H -3.984224 1.765751 -0.192427  
 H -2.724940 1.795956 1.060483  
 H -2.487428 2.659758 -0.459794  
 C -2.869152 -0.926645 1.162931  
 H -2.025462 -0.760667 1.843456  
 H -3.706347 -0.278956 1.424872  
 H -3.171769 -1.971435 1.198947  
 TS2\_M062X6-311++g\*\*\_sp.log  
 E = -351615.4480130506

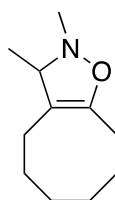

**PD2**

PD2\_M062X6-31G\*.log

Energy (E) = -560.256175457 Hartree  
Enthalpy (H) = -559.949794 Hartree  
Gibbs free energy (G) = -560.000465  
Hartree

Charge = 0, Spin = 1

|   |           |           |           |
|---|-----------|-----------|-----------|
| C | 2.035116  | -1.557385 | 0.295071  |
| C | 1.237052  | -1.339990 | -1.004193 |
| C | -0.073251 | -0.650902 | -0.772734 |
| C | -0.471409 | 0.609022  | -0.589580 |
| C | 0.307190  | 1.885835  | -0.541994 |
| C | 1.815782  | 1.719637  | -0.342524 |
| H | 2.683692  | -2.431233 | 0.165428  |
| H | 1.328341  | -1.811582 | 1.095798  |
| H | 0.995896  | -2.311151 | -1.447484 |
| H | 1.840643  | -0.799625 | -1.738818 |
| H | -0.081018 | 2.494855  | 0.287713  |
| H | 0.119011  | 2.476277  | -1.450855 |
| H | 2.260797  | 2.720213  | -0.323558 |
| H | 2.252140  | 1.223035  | -1.215859 |
| C | 2.192259  | 0.959137  | 0.949850  |
| H | 1.289872  | 0.788072  | 1.552535  |
| H | 2.847232  | 1.593771  | 1.556065  |
| C | 2.910234  | -0.379021 | 0.729398  |
| H | 3.414404  | -0.666041 | 1.659922  |
| H | 3.705895  | -0.231544 | -0.014442 |
| C | -1.986981 | 0.551834  | -0.462933 |
| H | -2.440332 | 0.716420  | -1.452388 |
| O | -1.120010 | -1.555118 | -0.698461 |
| N | -2.245599 | -0.867045 | -0.118405 |
| C | -2.614506 | 1.539538  | 0.510711  |
| H | -3.682348 | 1.336836  | 0.634873  |
| H | -2.131445 | 1.510624  | 1.492047  |
| H | -2.510752 | 2.553555  | 0.114226  |
| C | -2.149402 | -1.156971 | 1.310693  |
| H | -1.213794 | -0.792905 | 1.763012  |
| H | -3.002330 | -0.703965 | 1.820353  |
| H | -2.209135 | -2.239763 | 1.427365  |

PD2\_M062X6-311++g\*\*\_sp.log  
E = -351673.25623726257

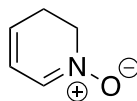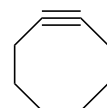

### CP3

CP3\_M062X6-31G\*.log

Energy (E) = -636.343027743 Hartree  
Enthalpy (H) = -636.025162 Hartree  
Gibbs free energy (G) = -636.085493  
Hartree

Charge = 0, Spin = 1

|   |           |           |           |
|---|-----------|-----------|-----------|
| C | 2.003136  | 1.959942  | -0.180475 |
| C | 1.260110  | 1.905242  | 1.176855  |
| C | 0.876205  | 0.508975  | 1.390802  |
| C | 0.878939  | -0.690957 | 1.243213  |
| C | 1.190406  | -1.993657 | 0.652357  |
| C | 2.453395  | -1.779936 | -0.218623 |
| H | 2.528088  | 2.920238  | -0.244133 |
| H | 1.255590  | 1.956248  | -0.982362 |
| H | 0.397616  | 2.580595  | 1.164599  |
| H | 1.923507  | 2.239416  | 1.983730  |
| H | 0.340490  | -2.337802 | 0.049828  |
| H | 1.371883  | -2.764593 | 1.407878  |
| H | 2.567358  | -2.652710 | -0.871555 |
| H | 3.334221  | -1.760024 | 0.434314  |
| C | 2.435088  | -0.492139 | -1.072521 |
| H | 1.406835  | -0.310215 | -1.412698 |
| H | 3.019758  | -0.692622 | -1.976878 |
| C | 2.999921  | 0.803792  | -0.417263 |
| H | 3.793253  | 1.189731  | -1.066551 |
| H | 3.487310  | 0.554043  | 0.533678  |
| C | -2.169757 | 1.755778  | -0.590375 |
| C | -1.409777 | 0.980235  | -1.374530 |
| C | -1.432681 | -0.467286 | -1.259048 |
| N | -1.977069 | -1.057061 | -0.227910 |
| C | -2.551355 | -0.233315 | 0.868800  |
| C | -3.113177 | 1.094708  | 0.378635  |
| O | -1.971837 | -2.305162 | -0.026938 |
| H | -2.170762 | 2.835872  | -0.694792 |
| H | -0.767805 | 1.399781  | -2.142840 |
| H | -0.976333 | -1.130354 | -1.983316 |
| H | -1.722591 | -0.090456 | 1.569339  |
| H | -3.306904 | -0.870289 | 1.326535  |
| H | -3.308618 | 1.730541  | 1.247063  |

H -4.081434 0.935027 -0.117934  
 CP3\_M062X6-311++g\*\*\_sp.log  
 E = -399440.9523028708

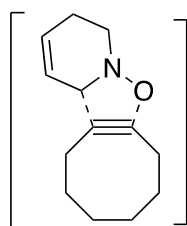

**TS3**

TS3\_M062X6-31G\*.log  
 Energy (E) = -636.327597215 Hartree  
 Enthalpy (H) = -636.010917 Hartree  
 Gibbs free energy (G) = -636.067233  
 Hartree  
 Charge = 0, Spin = 1

Imaginary frequency: -355.3235  
 C 2.329943 2.051719 -0.203617  
 C 0.808237 1.857101 -0.107582  
 C 0.439843 0.441553 -0.303084  
 C 0.743237 -0.756757 -0.305314  
 C 1.642009 -1.911395 -0.177630  
 C 2.914651 -1.515112 0.588166  
 H 2.555435 3.092954 0.057512  
 H 2.637921 1.919071 -1.248042  
 H 0.308716 2.507166 -0.838265  
 H 0.453832 2.186230 0.879076  
 H 1.903083 -2.265762 -1.183371  
 H 1.134113 -2.744102 0.318628  
 H 3.614876 -2.357285 0.537571  
 H 2.666506 -1.381575 1.648471  
 C 3.607219 -0.240778 0.069062  
 H 3.501846 -0.195824 -1.023143  
 H 4.680200 -0.351348 0.259636  
 C 3.154701 1.107497 0.691396  
 H 4.055426 1.651742 0.995371  
 H 2.596712 0.915399 1.617734  
 C -3.421225 1.205957 0.493226  
 C -2.513440 1.423206 -0.464810  
 C -1.723714 0.330519 -1.031478  
 N -1.859531 -0.896588 -0.548038  
 C -2.421536 -1.051341 0.798144  
 C -3.670756 -0.197080 0.977604  
 O -1.009495 -1.787619 -0.900311  
 H -4.017301 2.020930 0.892018

H -2.333072 2.417362 -0.861710  
 H -1.289547 0.396639 -2.020037  
 H -1.622257 -0.748200 1.490462  
 H -2.617863 -2.115623 0.927729  
 H -3.964504 -0.206042 2.031488  
 H -4.506454 -0.635199 0.413128  
 TS3\_M062X6-311++g\*\*\_sp.log  
 E = -399427.8256640271

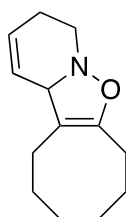

**PD3**

PD3\_M062X6-31G\*.log  
 Energy (E) = -636.427598035 Hartree  
 Enthalpy (H) = -636.107447 Hartree  
 Gibbs free energy (G) = -636.159508  
 Hartree  
 Charge = 0, Spin = 1

C 2.203264 1.753428 -0.228657  
 C 0.755392 1.851917 -0.715151  
 C 0.044406 0.543888 -0.855875  
 C 0.503744 -0.707345 -0.891437  
 C 1.854189 -1.354405 -0.836662  
 C 2.397844 -1.484737 0.598369  
 H 2.604876 2.770820 -0.172855  
 H 2.812933 1.240033 -0.980141  
 H 0.721627 2.405597 -1.664962  
 H 0.193149 2.464598 0.004922  
 H 2.569126 -0.822690 -1.470656  
 H 1.730752 -2.352152 -1.269348  
 H 3.085332 -2.337405 0.635842  
 H 1.560304 -1.731663 1.263824  
 C 3.138425 -0.255134 1.129808  
 H 4.055168 -0.107906 0.541544  
 H 3.466554 -0.481973 2.151207  
 C 2.349565 1.061011 1.146041  
 H 2.856190 1.745623 1.834417  
 H 1.354375 0.879239 1.573904  
 C -3.109906 1.016548 0.789118  
 C -2.300057 1.395069 -0.196835  
 C -1.470225 0.432245 -1.001549  
 N -1.746134 -0.978563 -0.657607

C -1.933560 -1.162554 0.786471  
 C -3.188400 -0.419942 1.225669  
 O -0.510998 -1.648920 -0.961142  
 H -3.731441 1.749822 1.297046  
 H -2.247281 2.436898 -0.504627  
 H -1.741185 0.568221 -2.061666  
 H -1.062339 -0.785120 1.346449  
 H -2.021597 -2.237217 0.959676  
 H -3.285457 -0.484948 2.314678  
 H -4.078259 -0.898404 0.797267  
 PD3\_M062X6-311++g\*\*\_sp.log  
 E = -399484.09674037056

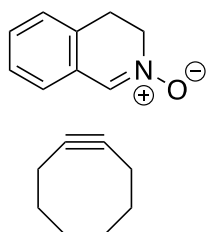

#### CP4

CP4\_M062X6-31G\*.log  
 Energy (E) = -789.945105447 Hartree  
 Enthalpy (H) = -789.577017 Hartree  
 Gibbs free energy (G) = -789.641298  
 Hartree  
 Charge = 0, Spin = 1

C 3.815952 0.141024 -0.286474  
 C 2.779300 1.022012 -1.022129  
 C 1.638269 0.152814 -1.310158  
 C 0.890628 -0.791792 -1.210869  
 C 0.383559 -2.064934 -0.699935  
 C 1.135031 -2.309753 0.628348  
 H 4.604761 0.796520 0.100793  
 H 4.291273 -0.524285 -1.017550  
 H 3.220011 1.456617 -1.925000  
 H 2.450773 1.861489 -0.395671  
 H 0.603907 -2.871866 -1.409687  
 H -0.700023 -2.057804 -0.538880  
 H 0.911384 -3.327820 0.968562  
 H 0.722186 -1.631029 1.387643  
 C 2.668476 -2.118758 0.545054  
 H 3.011178 -2.433410 -0.449348  
 H 3.114041 -2.828364 1.250692  
 C 3.259460 -0.715186 0.873955  
 H 4.092432 -0.871729 1.568355  
 H 2.523460 -0.126010 1.437306

C -2.037522 0.155033 0.871394  
 C -1.982536 0.647891 -0.443687  
 C -1.218894 1.852336 -0.730938  
 N -0.324402 2.314587 0.098770  
 C -0.082847 1.602504 1.377856  
 C -1.352880 0.978666 1.931379  
 O 0.440654 3.295816 -0.132718  
 C -2.743078 -1.011360 1.141251  
 C -3.403013 -1.692473 0.118170  
 C -3.354761 -1.200566 -1.185013  
 C -2.646825 -0.036824 -1.466206  
 H -1.280602 2.367290 -1.681738  
 H 0.351866 2.351785 2.037748  
 H 0.665646 0.838839 1.138603  
 H -2.030327 1.774769 2.269110  
 H -1.106526 0.369848 2.806838  
 H -2.780628 -1.387801 2.160526  
 H -3.951551 -2.602695 0.338423  
 H -3.864329 -1.728061 -1.985121  
 H -2.593275 0.341270 -2.483233  
 CP4\_M062X6-311++g\*\*\_sp.log  
 E = -495852.49614759185

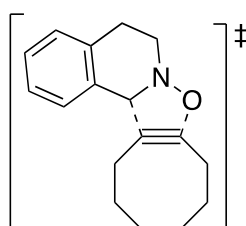

#### TS4

TS4\_M062X6-31G\*.log  
 Energy (E) = -789.929816511 Hartree  
 Enthalpy (H) = -789.562772 Hartree  
 Gibbs free energy (G) = -789.624481  
 Hartree  
 Charge = 0, Spin = 1  
 Imaginary frequency: -350.8202  
 C -4.253362 -0.508284 -0.208856  
 C -3.067806 -1.484129 -0.159920  
 C -1.802556 -0.752640 -0.299334  
 C -1.073478 0.246177 -0.298555  
 C -0.895493 1.695837 -0.095510  
 C -2.035485 2.273614 0.757854  
 H -5.165977 -1.074962 0.010962  
 H -4.361295 -0.129896 -1.232851  
 H -3.155759 -2.241811 -0.945847  
 H -3.066696 -2.027540 0.794008

H -0.883775 2.198009 -1.074016  
 H 0.072090 1.921503 0.370530  
 H -1.896785 3.360249 0.815167  
 H -1.937055 1.892862 1.782009  
 C -3.452168 1.967555 0.235504  
 H -3.432805 1.949507 -0.862681  
 H -4.086455 2.818739 0.506270  
 C -4.147898 0.683946 0.761509  
 H -5.168443 0.958107 1.050314  
 H -3.656494 0.352608 1.686418  
 C 2.839522 -0.453544 0.450705  
 C 2.043274 0.046020 -0.592921  
 C 0.886281 -0.717183 -1.060692  
 N 0.554866 -1.865152 -0.488158  
 C 1.041147 -2.138142 0.868220  
 C 2.527859 -1.832028 0.979655  
 O -0.578971 -2.383490 -0.785140  
 C 3.912111 0.302890 0.911531  
 C 4.201670 1.544587 0.349696  
 C 3.416046 2.036066 -0.690656  
 C 2.342599 1.288417 -1.160784  
 H 0.476117 -0.553604 -2.048656  
 H 0.815822 -3.185864 1.067110  
 H 0.437762 -1.508988 1.538334  
 H 3.088261 -2.575959 0.397401  
 H 2.848524 -1.931099 2.021090  
 H 4.528792 -0.086440 1.717869  
 H 5.039120 2.125792 0.722394  
 H 3.638995 3.001147 -1.134291  
 H 1.720189 1.666679 -1.967972  
 TS4\_M062X6-311++g\*\*\_sp.log  
 E = -495838.3171870284

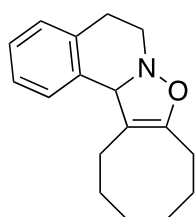

**PD4**

PD4\_M062X6-31G\*.log  
 Energy (E) = -790.024350498 Hartree  
 Enthalpy (H) = -789.653870 Hartree  
 Gibbs free energy (G) = -789.712211  
 Hartree  
 Charge = 0, Spin = 1  
 C -4.002391 -0.710665 -0.294863

C -2.851391 -1.220924 0.592049  
 C -1.479693 -0.922924 0.059330  
 C -0.690033 0.150393 -0.016456  
 C -0.891948 1.556957 0.449890  
 C -2.312150 1.903454 0.898495  
 H -4.871440 -1.359038 -0.135431  
 H -3.713851 -0.830173 -1.346536  
 H -2.911656 -2.310835 0.665036  
 H -2.959098 -0.834937 1.610423  
 H -0.629676 2.236312 -0.374768  
 H -0.174308 1.785815 1.249905  
 H -2.294695 2.926191 1.289550  
 H -2.601269 1.271465 1.745260  
 C -3.356132 1.802510 -0.236685  
 H -2.843564 1.617165 -1.190465  
 H -3.856600 2.770593 -0.344764  
 C -4.436201 0.733270 -0.038540  
 H -5.276080 0.952591 -0.708491  
 H -4.831930 0.813697 0.983819  
 C 2.866885 -0.511828 0.165615  
 C 1.877888 0.279526 -0.428476  
 C 0.529951 -0.290271 -0.831408  
 N 0.476162 -1.764066 -0.743948  
 C 1.127707 -2.265426 0.473163  
 C 2.616491 -1.983664 0.379223  
 O -0.918687 -2.037719 -0.547737  
 C 4.088832 0.066596 0.516672  
 C 4.343010 1.410355 0.275006  
 C 3.369528 2.192682 -0.342885  
 C 2.152726 1.624116 -0.697279  
 H 0.359241 -0.019336 -1.885798  
 H 0.928166 -3.338119 0.515941  
 H 0.704412 -1.792212 1.372844  
 H 3.036385 -2.552416 -0.459675  
 H 3.118899 -2.328096 1.289026  
 H 4.849478 -0.555686 0.982305  
 H 5.297555 1.843914 0.556680  
 H 3.560976 3.239722 -0.555880  
 H 1.406948 2.228665 -1.206568  
 PD4\_M062X6-311++g\*\*\_sp.log  
 E = -495891.76389231766

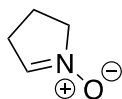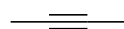

### CP5

CP5\_M062X6-31G\*.log

Energy (E) = -442.313221281 Hartree

Enthalpy (H) = -442.100446 Hartree

Gibbs free energy (G) = -442.152810 Hartree

Charge = 0, Spin = 1

|   |           |           |           |
|---|-----------|-----------|-----------|
| C | 0.680494  | 2.468899  | 0.279320  |
| C | 1.484323  | 1.259846  | 0.080665  |
| C | 2.151310  | 0.266504  | -0.088871 |
| C | 2.967921  | -0.931875 | -0.296087 |
| H | -0.311777 | 2.361772  | -0.175554 |
| H | 0.550769  | 2.673031  | 1.346657  |
| H | 2.770849  | -1.379066 | -1.275849 |
| H | 2.760478  | -1.689145 | 0.467609  |
| C | -1.380899 | -0.104155 | 1.057800  |
| H | -1.740891 | 0.568777  | 1.824492  |
| O | -2.173152 | 1.213973  | -0.667793 |
| N | -1.593176 | 0.199872  | -0.186094 |
| C | -0.987061 | -0.787699 | -1.116463 |
| H | -1.746041 | -1.028441 | -1.861780 |
| H | -0.153174 | -0.272389 | -1.599131 |
| C | -0.575548 | -1.350704 | 1.222889  |
| H | 0.437323  | -1.101560 | 1.562833  |
| H | -1.011772 | -2.038978 | 1.953055  |
| C | -0.565880 | -1.944858 | -0.209198 |
| H | 0.413875  | -2.341871 | -0.481461 |
| H | -1.289592 | -2.760498 | -0.278515 |
| H | 4.034497  | -0.693304 | -0.247393 |
| H | 1.174936  | 3.335037  | -0.170295 |

CP5\_M062X6-311++g\*\*\_sp.log

E = -277652.7589307745

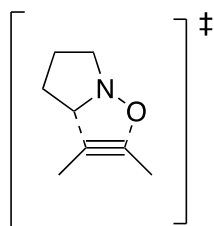

### TS5

TS5\_M062X6-31G\*.log

Energy (E) = -442.279540037 Hartree

Enthalpy (H) = -442.068046 Hartree

Gibbs free energy (G) = -442.115120 Hartree

Charge = 0, Spin = 1

Imaginary frequency: -459.1513

|   |           |           |           |
|---|-----------|-----------|-----------|
| C | -2.950194 | -0.868215 | -0.301883 |
| C | -1.791446 | 0.015092  | -0.106313 |
| C | -1.087258 | 1.035152  | -0.062856 |
| C | -0.840759 | 2.480663  | -0.250696 |
| H | -2.742415 | -1.610928 | -1.077078 |
| H | -3.163313 | -1.415372 | 0.620636  |
| H | -0.189368 | 2.660730  | -1.113656 |
| H | -0.345687 | 2.924220  | 0.621791  |
| C | 0.750002  | 0.291644  | 0.904161  |
| H | 0.322988  | 0.586199  | 1.854048  |
| O | -0.586710 | -1.511227 | 0.635283  |
| N | 0.547595  | -0.947191 | 0.473573  |
| C | 1.315072  | -1.204728 | -0.754125 |
| H | 1.537469  | -2.270115 | -0.824501 |
| H | 0.670855  | -0.910914 | -1.593585 |
| C | 2.008137  | 0.862138  | 0.307963  |
| H | 1.775174  | 1.751725  | -0.287800 |
| H | 2.736893  | 1.165675  | 1.065409  |
| C | 2.531619  | -0.296684 | -0.579898 |
| H | 2.932304  | 0.051709  | -1.533109 |
| H | 3.325008  | -0.835506 | -0.055416 |
| H | -1.772416 | 3.028283  | -0.422852 |
| H | -3.838014 | -0.295917 | -0.589285 |

TS5\_M062X6-311++g\*\*\_sp.log

E = -277627.4860728287

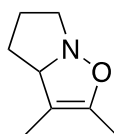

### PD5

PD5\_M062X6-31G\*.log

Energy (E) = -442.384541843 Hartree

Enthalpy (H) = -442.170011 Hartree

Gibbs free energy (G) = -442.215024 Hartree

Charge = 0, Spin = 1

|   |          |           |           |
|---|----------|-----------|-----------|
| C | 2.724340 | -0.919795 | 0.434738  |
| C | 1.388985 | -0.448493 | -0.024881 |
| C | 0.853834 | 0.766827  | -0.143812 |

|   |           |           |           |
|---|-----------|-----------|-----------|
| C | 1.454983  | 2.100876  | 0.147005  |
| H | 2.619615  | -1.575065 | 1.304927  |
| H | 3.210637  | -1.497028 | -0.357603 |
| H | 0.856140  | 2.661752  | 0.875014  |
| H | 1.509378  | 2.713877  | -0.761288 |
| C | -0.533643 | 0.597353  | -0.714222 |
| H | -0.585401 | 0.955831  | -1.751558 |
| O | 0.558730  | -1.464231 | -0.434813 |
| N | -0.730014 | -0.884528 | -0.689842 |
| C | -1.579556 | -1.164697 | 0.477967  |
| H | -2.014131 | -2.162882 | 0.391753  |
| H | -0.989687 | -1.107700 | 1.405511  |
| C | -1.690377 | 1.184141  | 0.129794  |
| H | -1.296802 | 1.583709  | 1.070754  |
| H | -2.213467 | 1.993431  | -0.384421 |
| C | -2.590865 | -0.028018 | 0.416256  |
| H | -3.167493 | 0.073361  | 1.338215  |
| H | -3.287409 | -0.195435 | -0.411000 |
| H | 2.467008  | 2.010192  | 0.550122  |
| H | 3.365652  | -0.077665 | 0.699903  |

PD5\_M062X6-311++g\*\*\_sp.log  
E = -277686.5573510512

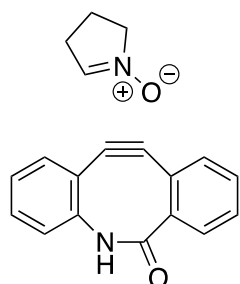

**CP6**

CP6\_M062X6-31G\*.log  
Energy (E) = -993.045204938 Hartree  
Enthalpy (H) = -992.711334 Hartree  
Gibbs free energy (G) = -992.784913 Hartree  
Charge = 0, Spin = 1

|   |           |           |           |
|---|-----------|-----------|-----------|
| C | 0.633916  | 2.411467  | 0.085808  |
| C | 1.367733  | 1.323495  | -0.433716 |
| C | 0.621975  | 0.119688  | -0.505774 |
| C | -0.430724 | -0.473549 | -0.437280 |
| C | -1.834242 | -0.643650 | -0.327395 |
| C | -2.543433 | 0.511039  | 0.069995  |
| C | -1.988851 | 1.844528  | 0.569895  |
| N | -0.669253 | 2.357093  | 0.643390  |
| C | 1.274359  | 3.655303  | 0.154884  |

|   |           |           |           |
|---|-----------|-----------|-----------|
| C | 2.588234  | 3.814859  | -0.269116 |
| C | 3.303399  | 2.736430  | -0.784535 |
| C | 2.684301  | 1.496987  | -0.866709 |
| C | -2.496445 | -1.833520 | -0.634906 |
| C | -3.883994 | -1.880725 | -0.585560 |
| C | -4.603595 | -0.744388 | -0.227860 |
| C | -3.938857 | 0.431663  | 0.105575  |
| O | -2.805701 | 2.593328  | 1.083370  |
| H | -0.830994 | 3.226754  | 1.141978  |
| H | 0.730087  | 4.511917  | 0.544113  |
| H | 3.050463  | 4.794406  | -0.200569 |
| H | 4.325958  | 2.862886  | -1.122943 |
| H | 3.206155  | 0.638103  | -1.278254 |
| H | -1.893691 | -2.692741 | -0.907965 |
| H | -4.401964 | -2.802558 | -0.831398 |
| H | -5.688092 | -0.770763 | -0.196369 |
| H | -4.495652 | 1.307983  | 0.411706  |
| C | 2.454503  | -2.353667 | -0.646247 |
| H | 2.592927  | -2.148273 | -1.699070 |
| O | 0.327331  | -3.199011 | -0.943954 |
| N | 1.338920  | -2.891038 | -0.256921 |
| C | 1.269790  | -3.014452 | 1.220184  |
| H | 0.593341  | -2.219110 | 1.549777  |
| H | 0.825849  | -3.983684 | 1.448006  |
| C | 3.363277  | -2.035637 | 0.500226  |
| H | 4.399638  | -2.334545 | 0.318749  |
| H | 3.364567  | -0.955701 | 0.701274  |
| C | 2.718057  | -2.824667 | 1.664900  |
| H | 3.206729  | -3.796965 | 1.767090  |
| H | 2.797544  | -2.301860 | 2.619047  |

CP6\_M062X6-311++g\*\*\_sp.log  
E = -623335.3496867309

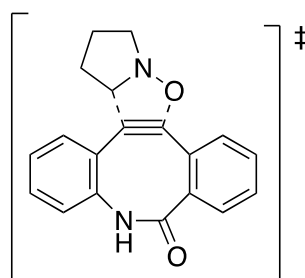

**TS6**

TS6\_M062X6-31G\*.log  
Energy (E) = -993.041138596 Hartree  
Enthalpy (H) = -992.708360 Hartree  
Gibbs free energy (G) = -992.774752 Hartree  
Charge = 0, Spin = 1

Imaginary frequency: -216.1101

|   |           |           |           |
|---|-----------|-----------|-----------|
| C | -0.438436 | -2.229215 | 0.209226  |
| C | -1.201170 | -1.257974 | -0.475879 |
| C | -0.702432 | 0.080995  | -0.456936 |
| C | 0.339731  | 0.732859  | -0.379301 |
| C | 1.765932  | 0.800209  | -0.383045 |
| C | 2.473954  | -0.283908 | 0.175391  |
| C | 1.921082  | -1.370217 | 1.077894  |
| N | 0.633770  | -1.918205 | 1.092606  |
| C | -0.846024 | -3.563815 | 0.158867  |
| C | -1.982329 | -3.943284 | -0.549492 |
| C | -2.734805 | -2.987485 | -1.225202 |
| C | -2.341185 | -1.655403 | -1.182010 |
| C | 2.454596  | 1.843702  | -1.010101 |
| C | 3.836530  | 1.798497  | -1.128253 |
| C | 4.543984  | 0.717742  | -0.605453 |
| C | 3.867285  | -0.297722 | 0.058973  |
| O | 2.671597  | -1.793366 | 1.943391  |
| H | 0.666205  | -2.591119 | 1.852312  |
| H | -0.257570 | -4.313341 | 0.681467  |
| H | -2.273337 | -4.988509 | -0.572810 |
| H | -3.620258 | -3.276720 | -1.781608 |
| H | -2.910563 | -0.895401 | -1.709922 |
| H | 1.876517  | 2.672929  | -1.401401 |
| H | 4.362711  | 2.606341  | -1.627510 |
| H | 5.624554  | 0.674476  | -0.696293 |
| H | 4.411731  | -1.114485 | 0.518166  |
| C | -2.341659 | 1.897872  | -0.681718 |
| H | -2.205918 | 1.744479  | -1.742524 |
| O | -0.280059 | 2.839000  | -0.400556 |
| N | -1.472504 | 2.623736  | -0.025888 |
| C | -1.821944 | 2.740714  | 1.403270  |
| H | -1.237833 | 1.968841  | 1.918034  |
| H | -1.514825 | 3.724546  | 1.758456  |
| C | -3.559783 | 1.610904  | 0.143860  |
| H | -4.491675 | 1.862488  | -0.370444 |
| H | -3.596467 | 0.542162  | 0.387863  |
| C | -3.327308 | 2.477822  | 1.407076  |
| H | -3.869969 | 3.421943  | 1.312949  |
| H | -3.660571 | 1.983808  | 2.320546  |

TS6\_M062X6-311++g\*\*\_sp.log  
E = -623332.2627303521

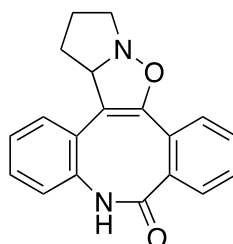

**PD6**

PD6\_M062X6-31G\*.log  
Energy (E) = -993.154264023 Hartree  
Enthalpy (H) = -992.818328 Hartree  
Gibbs free energy (G) = -992.881666 Hartree  
Charge = 0, Spin = 1

|   |           |           |           |
|---|-----------|-----------|-----------|
| C | -0.035814 | 1.940152  | 0.483608  |
| C | 0.763789  | 1.331780  | -0.495203 |
| C | 1.018952  | -0.107306 | -0.492372 |
| C | 0.115996  | -1.092451 | -0.433828 |
| C | -1.354855 | -1.054775 | -0.463235 |
| C | -2.135430 | -0.315331 | 0.435474  |
| C | -1.619399 | 0.369248  | 1.671716  |
| N | -0.527721 | 1.204978  | 1.600575  |
| C | -0.253980 | 3.320099  | 0.452032  |
| C | 0.328771  | 4.108311  | -0.531006 |
| C | 1.138206  | 3.516311  | -1.499397 |
| C | 1.348958  | 2.145043  | -1.476477 |
| C | -1.987429 | -1.823103 | -1.450027 |
| C | -3.368912 | -1.821475 | -1.573971 |
| C | -4.144767 | -1.072547 | -0.690274 |
| C | -3.528780 | -0.349220 | 0.320318  |
| O | -2.175706 | 0.186165  | 2.739022  |
| H | -0.375918 | 1.647320  | 2.501487  |
| H | -0.880185 | 3.767464  | 1.218854  |
| H | 0.154010  | 5.179270  | -0.539911 |
| H | 1.601511  | 4.122929  | -2.270849 |
| H | 1.975268  | 1.680847  | -2.233160 |
| H | -1.372814 | -2.418465 | -2.117221 |
| H | -3.841437 | -2.410324 | -2.353774 |
| H | -5.226720 | -1.073375 | -0.774438 |
| H | -4.117465 | 0.187592  | 1.056726  |
| C | 2.376197  | -0.743731 | -0.688899 |
| H | 2.743837  | -0.602669 | -1.713632 |
| O | 0.663366  | -2.343611 | -0.553660 |
| N | 2.088542  | -2.191181 | -0.461758 |
| C | 2.473179  | -2.460831 | 0.935189  |
| H | 1.720027  | -2.054618 | 1.626673  |
| H | 2.562474  | -3.537350 | 1.091921  |



C 3.449965 -0.362106 0.356739  
H 4.323417 0.107613 -0.100303  
H 3.024421 0.348006 1.072870  
C 3.783358 -1.693505 1.052694  
H 4.573355 -2.223638 0.512365  
H 4.101161 -1.564989 2.089289  
PD6\_M062X6-311++g\*\*\_sp.log  
E = -623397.6253780263

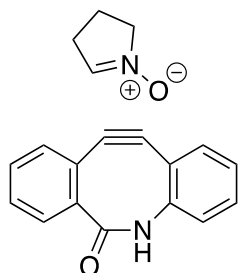

**CP7**

CP7\_M062X6-31G\*.log  
Energy (E) = -993.046008750 Hartree  
Enthalpy (H) = -992.712352 Hartree  
Gibbs free energy (G) = -992.781552 Hartree  
Charge = 0, Spin = 1  
C 2.120358 -1.205051 -0.072552  
C 2.154195 -0.116013 -0.969607  
C 0.886896 0.157222 -1.544420  
C -0.302554 -0.029748 -1.663838  
C -1.574772 -0.497430 -1.242842  
C -1.554184 -1.251515 -0.049361  
C -0.324813 -1.684033 0.732885  
N 0.959297 -2.010637 0.159984  
C 3.305454 -1.559739 0.577252  
C 4.482087 -0.854910 0.344951  
C 4.497155 0.237955 -0.519281  
C 3.327531 0.611509 -1.166478  
C -2.785677 -0.207784 -1.876137  
C -3.982929 -0.652885 -1.328368  
C -3.977124 -1.379770 -0.139528  
C -2.772404 -1.670896 0.493517  
O -0.492678 -2.021203 1.888554  
H 1.265209 -2.748443 0.791376  
H 3.304940 -2.393427 1.274881  
H 5.389096 -1.155311 0.860014  
H 5.411311 0.799537 -0.677727  
H 3.292292 1.475707 -1.819827

H -2.772096 0.379103 -2.788259  
H -4.921147 -0.424710 -1.824411  
H -4.909919 -1.721957 0.296388  
H -2.757949 -2.232396 1.420530  
C -1.244703 2.629123 -0.004871  
H -1.485710 3.161401 -0.915155  
O 1.035308 2.785542 -0.351285  
N 0.006023 2.438899 0.288646  
C 0.174899 1.648659 1.534744  
H 0.655379 0.711870 1.237070  
H 0.874674 2.199566 2.165128  
C -2.184494 2.042618 0.997594  
H -2.877475 2.793801 1.391785  
H -2.796374 1.248263 0.552770  
C -1.238870 1.494010 2.102359  
H -1.347369 2.075343 3.020154  
H -1.459450 0.451187 2.340606  
CP7\_M062X6-311++g\*\*\_sp.log  
E = -623338.2981623203

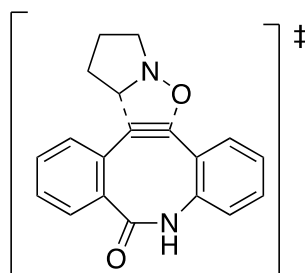

**TS7**

TS7\_M062X6-31G\*.log  
Energy (E) = -993.038878720 Hartree  
Enthalpy (H) = -992.706454 Hartree  
Gibbs free energy (G) = -992.773551 Hartree  
Charge = 0, Spin = 1  
Imaginary frequency: -235.3998  
C 2.121949 -0.815985 0.444034  
C 2.096608 0.080204 -0.646694  
C 0.810030 0.600457 -0.972319  
C -0.394600 0.359190 -1.059676  
C -1.367111 -0.681816 -0.912761  
C -1.224595 -1.525526 0.207351  
C -0.314034 -1.263852 1.390457  
N 1.038939 -0.966716 1.359343  
C 3.318375 -1.455834 0.766421  
C 4.475991 -1.211383 0.033685

C 4.452275 -0.316018 -1.032671  
 C 3.266170 0.324768 -1.368735  
 C -2.401239 -0.915647 -1.826862  
 C -3.257332 -1.997135 -1.660445  
 C -3.111919 -2.839653 -0.560313  
 C -2.119100 -2.583232 0.379120  
 O -0.821167 -1.362874 2.500062  
 H 1.353026 -0.967495 2.324668  
 H 3.335297 -2.147774 1.603974  
 H 5.396079 -1.720573 0.301652  
 H 5.355308 -0.117139 -1.600320  
 H 3.224358 1.029407 -2.192322  
 H -2.508716 -0.247090 -2.675577  
 H -4.043435 -2.178777 -2.386916  
 H -3.783646 -3.680298 -0.421468  
 H -2.031331 -3.195589 1.270186  
 C -1.371619 2.535214 -0.740373  
 H -1.355570 2.678957 -1.811780  
 O 0.883345 2.796721 -0.539226  
 N -0.286002 2.790227 -0.054419  
 C -0.477006 2.613202 1.401463  
 H 0.271344 1.880903 1.716594  
 H -0.272064 3.568395 1.891189  
 C -2.565876 2.370340 0.144007  
 H -3.200758 3.264637 0.129789  
 H -3.181767 1.525459 -0.179536  
 C -1.925292 2.120493 1.533530  
 H -2.463521 2.633777 2.331834  
 H -1.932633 1.051129 1.761571  
 TS7\_M062X6-311++g\*\*\_sp.log  
 E = -623331.7411201947

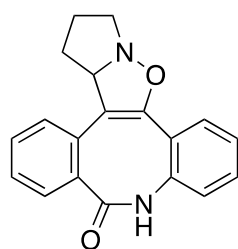

**PD7**

PD7\_M062X6-31G\*.log  
 Energy (E) = -993.155237937 Hartree  
 Enthalpy (H) = -992.819579 Hartree  
 Gibbs free energy (G) = -992.883259  
 Hartree  
 Charge = 0, Spin = 1

C 1.903721 0.792531 0.634520  
 C 1.129908 1.399395 -0.362047  
 C -0.311118 1.140384 -0.452792  
 C -0.960654 -0.021318 -0.556432  
 C -0.385673 -1.372262 -0.639083  
 C 0.471091 -1.909169 0.334206  
 C 0.792330 -1.249669 1.646902  
 N 1.308535 0.026225 1.673504  
 C 3.274314 1.055422 0.694855  
 C 3.868473 1.918528 -0.217266  
 C 3.096871 2.531798 -1.203118  
 C 1.734727 2.273019 -1.270606  
 C -0.741251 -2.180594 -1.729745  
 C -0.238953 -3.465913 -1.871288  
 C 0.618057 -3.987970 -0.903399  
 C 0.949117 -3.216894 0.200797  
 O 0.629757 -1.856549 2.690037  
 H 1.582931 0.280888 2.616576  
 H 3.864844 0.579649 1.472309  
 H 4.934333 2.113863 -0.156563  
 H 3.556314 3.210831 -1.913791  
 H 1.114319 2.748518 -2.023537  
 H -1.412288 -1.776753 -2.482436  
 H -0.518380 -4.062713 -2.734044  
 H 1.007311 -4.996292 -0.999906  
 H 1.569920 -3.622279 0.993289  
 C -2.434037 0.280886 -0.674749  
 H -2.879935 -0.141058 -1.582070  
 O -1.103541 2.239191 -0.537376  
 N -2.471129 1.781849 -0.757039  
 C -3.232045 2.234053 0.424204  
 H -2.865534 3.216528 0.722728  
 H -4.275618 2.332959 0.103793  
 C -3.221208 -0.120448 0.596562  
 H -4.271821 -0.314476 0.353331  
 H -2.802208 -1.021990 1.052279  
 C -3.098463 1.128494 1.472341  
 H -3.857595 1.183398 2.255990  
 H -2.109398 1.169628 1.942334  
 PD7\_M062X6-311++g\*\*\_sp.log  
 E = -623398.4658391924

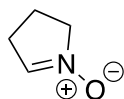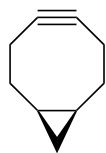

**CP8**

CP8\_M062X6-31G\*.log

Energy (E) = -636.339342363 Hartree

Enthalpy (H) = -636.021313 Hartree

Gibbs free energy (G) = -636.078605 Hartree

Charge = 0, Spin = 1

|   |           |           |           |
|---|-----------|-----------|-----------|
| C | 2.429051  | 1.571008  | 0.117883  |
| C | 1.155719  | 2.307279  | -0.373688 |
| C | 0.394418  | 1.309014  | -1.135930 |
| C | 0.179813  | 0.185969  | -1.534594 |
| C | 0.423833  | -1.255091 | -1.666864 |
| C | 1.792456  | -1.482771 | -0.975784 |
| C | 1.806298  | -1.042133 | 0.477382  |
| C | 2.119443  | 0.357959  | 0.975501  |
| C | 3.112735  | -0.756222 | 1.164616  |
| H | 3.050744  | 2.268179  | 0.694263  |
| H | 3.011655  | 1.273466  | -0.761192 |
| H | 1.424689  | 3.181155  | -0.975893 |
| H | 0.578795  | 2.675555  | 0.485407  |
| H | 0.461299  | -1.576612 | -2.712620 |
| H | -0.344096 | -1.842904 | -1.150137 |
| H | 2.565722  | -0.950533 | -1.542751 |
| H | 2.040338  | -2.550618 | -1.017931 |
| H | 1.049128  | -1.554994 | 1.070177  |
| H | 1.570972  | 0.621320  | 1.880722  |
| H | 3.293316  | -1.143544 | 2.161769  |
| H | 3.995167  | -0.729660 | 0.528835  |
| C | -2.759012 | -0.644939 | -0.474128 |
| H | -3.040052 | -1.438015 | -1.154447 |
| O | -1.468952 | -2.043718 | 0.837586  |
| N | -1.985354 | -0.929743 | 0.526834  |
| C | -1.652075 | 0.264588  | 1.341856  |
| H | -1.861426 | 0.006116  | 2.381237  |
| H | -0.577827 | 0.415589  | 1.214544  |
| C | -3.079341 | 0.809384  | -0.571516 |
| H | -2.570519 | 1.247518  | -1.437770 |
| H | -4.152049 | 0.994464  | -0.683506 |
| C | -2.518766 | 1.382687  | 0.756894  |

H -1.938517 2.290907 0.582687  
 H -3.335673 1.630172 1.438297  
 CP8\_M062X6-311++g\*\*\_sp.log  
 E = -399437.9689465105

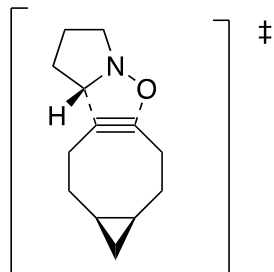

**TS8**

TS8\_M062X6-31G\*.log

Energy (E) = -636.321480167 Hartree

Enthalpy (H) = -636.004948 Hartree

Gibbs free energy (G) = -636.059944 Hartree

Charge = 0, Spin = 1

Imaginary frequency: -313.2196

|   |           |           |           |
|---|-----------|-----------|-----------|
| C | -2.045045 | -1.710890 | -0.570835 |
| C | -0.505102 | -1.755163 | -0.509422 |
| C | 0.027117  | -0.378352 | -0.470072 |
| C | -0.222269 | 0.823786  | -0.357925 |
| C | -1.106922 | 1.983492  | -0.201975 |
| C | -2.564891 | 1.493048  | -0.300935 |
| C | -2.914016 | 0.461644  | 0.753546  |
| C | -2.668684 | -1.025404 | 0.628056  |
| C | -4.070298 | -0.480987 | 0.563518  |
| H | -2.439239 | -2.733791 | -0.636587 |
| H | -2.340131 | -1.198015 | -1.493626 |
| H | -0.112416 | -2.312556 | -1.370286 |
| H | -0.189035 | -2.313156 | 0.383579  |
| H | -0.893963 | 2.734586  | -0.970164 |
| H | -0.928764 | 2.468863  | 0.765635  |
| H | -2.727904 | 1.076215  | -1.301844 |
| H | -3.247264 | 2.346874  | -0.200537 |
| H | -2.788591 | 0.837364  | 1.768375  |
| H | -2.405240 | -1.503765 | 1.570883  |
| H | -4.752681 | -0.663952 | 1.386964  |
| H | -4.542936 | -0.476016 | -0.416106 |
| C | 2.317566  | -0.315333 | -0.916366 |
| H | 2.030759  | -0.295083 | -1.957863 |
| O | 1.686348  | 1.834570  | -0.518965 |
| N | 2.404047  | 0.818982  | -0.253859 |
| C | 2.872448  | 0.598703  | 1.124420  |

|   |          |           |           |
|---|----------|-----------|-----------|
| H | 3.433293 | 1.473904  | 1.454032  |
| H | 1.968976 | 0.492240  | 1.738155  |
| C | 3.047578 | -1.419529 | -0.208008 |
| H | 2.338172 | -2.191867 | 0.111899  |
| H | 3.796654 | -1.908987 | -0.837475 |
| C | 3.682609 | -0.691348 | 1.004251  |
| H | 3.652949 | -1.289206 | 1.916439  |
| H | 4.727710 | -0.455094 | 0.787737  |

TS8\_M062X6-311++g\*\*\_sp.log  
E = -399425.40945747995

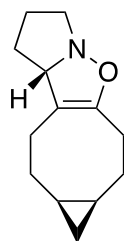

**PD8**

PD8\_M062X6-31G\*.log  
Energy (E) = -636.420445961 Hartree  
Enthalpy (H) = -636.100331 Hartree  
Gibbs free energy (G) = -636.152745 Hartree  
Charge = 0, Spin = 1

|   |           |           |           |
|---|-----------|-----------|-----------|
| C | -2.001808 | -1.538920 | -0.678843 |
| C | -0.477253 | -1.613060 | -0.691066 |
| C | 0.347071  | -0.362468 | -0.572887 |
| C | 0.142693  | 0.950423  | -0.404408 |
| C | -0.976965 | 1.926734  | -0.176475 |
| C | -2.423754 | 1.451366  | -0.235935 |
| C | -2.768722 | 0.452387  | 0.841767  |
| C | -2.561236 | -1.020050 | 0.623326  |
| C | -3.954124 | -0.457371 | 0.679405  |
| H | -2.388437 | -2.550735 | -0.853381 |
| H | -2.355085 | -0.933588 | -1.519751 |
| H | -0.162617 | -2.109968 | -1.621662 |
| H | -0.166636 | -2.301082 | 0.110138  |
| H | -0.825830 | 2.731668  | -0.906001 |
| H | -0.789419 | 2.387160  | 0.803458  |
| H | -2.648169 | 1.045327  | -1.227134 |
| H | -3.065949 | 2.333061  | -0.121388 |
| H | -2.577451 | 0.810896  | 1.851621  |
| H | -2.239959 | -1.584891 | 1.496740  |
| H | -4.572006 | -0.672145 | 1.544499  |
| H | -4.500313 | -0.395219 | -0.258833 |
| C | 1.843159  | -0.556962 | -0.755722 |

|   |          |           |           |
|---|----------|-----------|-----------|
| H | 2.068719 | -0.851822 | -1.790820 |
| O | 1.316605 | 1.686809  | -0.462040 |
| N | 2.418673 | 0.782615  | -0.477880 |
| C | 2.978166 | 0.722352  | 0.880816  |
| H | 3.673722 | 1.550010  | 1.035342  |
| H | 2.174989 | 0.781786  | 1.631339  |
| C | 2.525816 | -1.518415 | 0.248500  |
| H | 1.807046 | -1.825304 | 1.015837  |
| H | 2.911113 | -2.421684 | -0.229995 |
| C | 3.622602 | -0.657101 | 0.893088  |
| H | 3.893671 | -0.988625 | 1.897775  |
| H | 4.525197 | -0.651103 | 0.274296  |

PD8\_M062X6-311++g\*\*\_sp.log  
E = -399480.0713396493

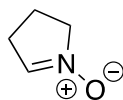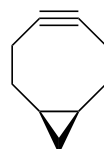

**CP8'**

CP8'\_M062X6-31G\*.log  
Energy (E) = -636.336595548 Hartree  
Enthalpy (H) = -636.018870 Hartree  
Gibbs free energy (G) = -636.077617 Hartree  
Charge = 0, Spin = 1

|   |           |           |           |
|---|-----------|-----------|-----------|
| C | 1.493651  | 1.638609  | 0.036547  |
| C | 0.482947  | 1.526185  | 1.205481  |
| C | 0.206718  | 0.090092  | 1.319157  |
| C | 0.347446  | -1.087591 | 1.076032  |
| C | 1.002592  | -2.216646 | 0.403542  |
| C | 1.947791  | -1.581957 | -0.648418 |
| C | 2.970119  | -0.633496 | -0.051142 |
| C | 2.763733  | 0.837196  | 0.255423  |
| C | 3.631336  | 0.419089  | -0.899845 |
| H | 1.760240  | 2.693542  | -0.104324 |
| H | 0.973476  | 1.325258  | -0.875480 |
| H | -0.409378 | 2.109574  | 0.958525  |
| H | 0.911888  | 1.918348  | 2.134994  |
| H | 0.289670  | -2.891260 | -0.084676 |
| H | 1.576371  | -2.820610 | 1.116402  |
| H | 1.338009  | -1.049529 | -1.388450 |
| H | 2.475737  | -2.378867 | -1.188207 |

H 3.630519 -1.127869 0.660555  
H 3.312386 1.159517 1.139959  
H 4.706161 0.556035 -0.843577  
H 3.212963 0.569682 -1.892495  
C -2.837418 0.734371 0.545034  
H -3.004284 1.601249 1.170536  
O -1.653959 1.928647 -1.043250  
N -2.175085 0.881866 -0.561062  
C -1.992260 -0.403566 -1.281211  
H -2.281116 -0.229944 -2.318690  
H -0.922598 -0.620418 -1.234528  
C -3.182903 -0.689612 0.830153  
H -2.547984 -1.070544 1.639022  
H -4.226486 -0.819573 1.131400  
C -2.865529 -1.396712 -0.512238  
H -2.358169 -2.350629 -0.357075  
H -3.789468 -1.591973 -1.061544  
CP8b\_M062X6-311++g\*\*\_sp.log  
E = -399437.61848468555

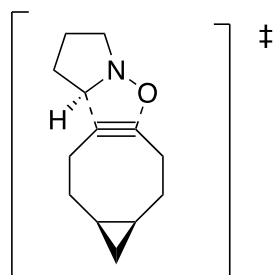

**TS8'**

TS8'\_M062X6-31G\*.log  
Energy (E) = -636.321280016 Hartree  
Enthalpy (H) = -636.004801 Hartree  
Gibbs free energy (G) = -636.059828 Hartree  
Charge = 0, Spin = 1  
Imaginary frequency: -316.7216  
C -2.466977 1.479194 0.594464  
C -1.075733 1.962002 0.139352  
C -0.212949 0.787947 -0.033413  
C 0.024729 -0.421499 -0.074579  
C -0.509521 -1.791483 0.060597  
C -1.974987 -1.732635 0.536134  
C -2.879006 -0.973984 -0.413963  
C -3.110917 0.519761 -0.386366  
C -4.198923 -0.421365 0.052428  
H -3.128506 2.344449 0.730290  
H -2.370209 1.001595 1.576759

H -0.648300 2.659176 0.867753  
H -1.146488 2.509425 -0.808778  
H 0.082677 -2.387967 0.767031  
H -0.451747 -2.317716 -0.903026  
H -1.998865 -1.268541 1.529073  
H -2.362941 -2.753181 0.654581  
H -2.886662 -1.397404 -1.417756  
H -3.249045 0.956118 -1.374758  
H -5.079693 -0.547669 -0.568416  
H -4.394641 -0.471172 1.121247  
C 2.188112 -0.410058 -0.959105  
H 1.703928 -0.489975 -1.921736  
O 1.607729 1.768829 -0.651273  
N 2.382283 0.783078 -0.437282  
C 3.113589 0.696022 0.837360  
H 3.709328 1.599880 0.968747  
H 2.348783 0.645492 1.622773  
C 3.064569 -1.440024 -0.307265  
H 2.447403 -2.177454 0.219150  
H 3.684100 -1.988505 -1.022975  
C 3.911376 -0.597657 0.680811  
H 4.075056 -1.105059 1.632727  
H 4.887833 -0.380987 0.239738  
TS8b\_M062X6-311++g\*\*\_sp.log  
E = -399425.19587566634

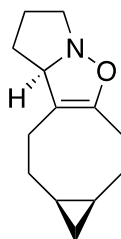

**PD8'**

PD8'\_M062X6-31G\*.log  
Energy (E) = -636.420311138 Hartree  
Enthalpy (H) = -636.100282 Hartree  
Gibbs free energy (G) = -636.152742 Hartree  
Charge = 0, Spin = 1  
C -2.315501 1.371811 0.709237  
C -0.942666 1.873847 0.277377  
C 0.127712 0.890197 -0.103625  
C 0.330846 -0.431362 -0.179975  
C -0.457945 -1.694074 0.021875  
C -1.910912 -1.639047 0.487914

C -2.819489 -0.909013 -0.470921  
 C -3.021206 0.576193 -0.361602  
 C -4.137088 -0.362102 0.003727  
 H -2.922670 2.249222 0.962957  
 H -2.233705 0.789437 1.632193  
 H -0.516310 2.504687 1.067405  
 H -1.059950 2.538328 -0.589291  
 H 0.100926 -2.333787 0.719700  
 H -0.428918 -2.237053 -0.937172  
 H -1.969315 -1.196446 1.487462  
 H -2.265563 -2.671496 0.597360  
 H -2.804877 -1.309015 -1.483154  
 H -3.132757 1.107884 -1.304749  
 H -4.999317 -0.429896 -0.650662  
 H -4.365873 -0.471288 1.061228  
 C 1.743338 -0.631966 -0.703329  
 H 1.719376 -1.035963 -1.725871  
 O 1.227078 1.626824 -0.517747  
 N 2.321733 0.735103 -0.716818  
 C 3.202394 0.827042 0.457409  
 H 3.885854 1.671621 0.346562  
 H 2.608839 0.961943 1.374648  
 C 2.684242 -1.472082 0.195018  
 H 2.187431 -1.695824 1.145324  
 H 2.969252 -2.420724 -0.265656  
 C 3.876673 -0.538184 0.451406  
 H 4.399638 -0.756095 1.385126  
 H 4.596807 -0.593405 -0.370774  
 PD8b\_M062X6-311++g\*\*\_sp.log  
 E = -399480.02956317103

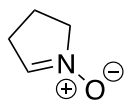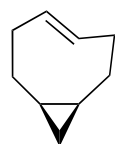

**CP9**

CP9\_M062X6-31G\*.log  
 Energy (E) = -637.564865696 Hartree  
 Enthalpy (H) = -637.223743 Hartree  
 Gibbs free energy (G) = -637.284850 Hartree  
 Charge = 0, Spin = 1  
 C 2.066676 1.493959 -0.764076

C 0.620304 1.623595 -0.208334  
 C 0.377093 0.313234 0.480492  
 C 0.331304 -0.830889 -0.203569  
 C 1.092048 -2.028278 0.280905  
 C 2.554032 -1.754764 -0.171230  
 C 3.227723 -0.583197 0.529827  
 C 3.034397 0.899899 0.248904  
 C 4.304045 0.213312 -0.163565  
 H 2.447240 2.467290 -1.099495  
 H 2.034266 0.843607 -1.647478  
 H -0.084653 1.796211 -1.028976  
 H 0.525696 2.465718 0.481150  
 H 0.625748 0.268599 1.541936  
 H 0.157976 -0.783231 -1.283065  
 H 0.744571 -2.978005 -0.139787  
 H 1.053959 -2.105836 1.374585  
 H 2.551397 -1.585214 -1.256197  
 H 3.170162 -2.647752 -0.003596  
 H 3.421178 -0.788589 1.582341  
 H 3.121822 1.507620 1.149426  
 H 5.228648 0.435877 0.358953  
 H 4.427867 0.022819 -1.227433  
 C -2.760746 0.538631 -1.022139  
 H -2.490034 1.267387 -1.774026  
 O -2.220682 1.926498 0.747122  
 N -2.639359 0.856445 0.232161  
 C -2.995670 -0.277324 1.125075  
 H -2.047572 -0.647035 1.524061  
 H -3.599856 0.130979 1.935596  
 C -3.212363 -0.874133 -1.215100  
 H -3.999010 -0.969258 -1.969330  
 H -2.375162 -1.508637 -1.533952  
 C -3.705972 -1.263042 0.199687  
 H -4.788130 -1.123825 0.264027  
 H -3.482378 -2.301845 0.447894  
 CP9\_M062X6-311++g\*\*\_sp.log  
 E = -400208.1597525145

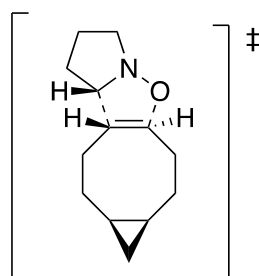

**TS9**

TS9\_M062X6-31G\*.log  
Energy (E) = -637.552915179 Hartree  
Enthalpy (H) = -637.212791 Hartree  
Gibbs free energy (G) = -637.266968  
Hartree

Charge = 0, Spin = 1

Imaginary frequency: -332.1715

|   |           |           |           |
|---|-----------|-----------|-----------|
| C | 2.588024  | 1.337104  | -0.590626 |
| C | 1.186070  | 1.951726  | -0.356210 |
| C | 0.302975  | 0.830827  | 0.105720  |
| C | 0.028759  | -0.226639 | -0.718227 |
| C | 0.299349  | -1.622442 | -0.222674 |
| C | 1.829134  | -1.850319 | -0.295961 |
| C | 2.641751  | -1.027518 | 0.691678  |
| C | 3.022452  | 0.435176  | 0.551529  |
| C | 4.061883  | -0.633941 | 0.374612  |
| H | 3.338947  | 2.123885  | -0.738928 |
| H | 2.558657  | 0.750042  | -1.516999 |
| H | 0.805753  | 2.389211  | -1.286196 |
| H | 1.228785  | 2.753617  | 0.388363  |
| H | 0.335686  | 0.625499  | 1.175951  |
| H | 0.247868  | -0.085560 | -1.780777 |
| H | -0.205777 | -2.395597 | -0.816855 |
| H | -0.038217 | -1.739589 | 0.817370  |
| H | 2.158032  | -1.629608 | -1.320200 |
| H | 2.062005  | -2.909521 | -0.122209 |
| H | 2.470011  | -1.327793 | 1.725068  |
| H | 3.064732  | 0.955693  | 1.508288  |
| H | 4.833477  | -0.758235 | 1.127376  |
| H | 4.396237  | -0.823853 | -0.642938 |
| C | -2.298377 | 0.136835  | -0.987755 |
| H | -2.023457 | 0.578798  | -1.934139 |
| O | -1.558989 | 1.898462  | 0.257428  |
| N | -2.339460 | 0.906058  | 0.083615  |
| C | -2.857331 | 0.173289  | 1.249621  |
| H | -1.985300 | -0.237144 | 1.776905  |
| H | -3.374090 | 0.872073  | 1.908436  |
| C | -3.101449 | -1.115910 | -0.787275 |
| H | -3.853285 | -1.271320 | -1.566504 |
| H | -2.440135 | -1.990155 | -0.793341 |
| C | -3.736567 | -0.899903 | 0.609956  |
| H | -4.757071 | -0.524050 | 0.499124  |
| H | -3.774756 | -1.816202 | 1.201151  |

TS9\_M062X6-311++g\*\*\_sp.log

E = -400196.8241043946

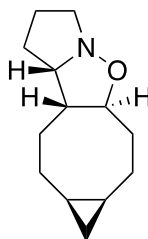

### PD9

PD9\_M062X6-31G\*.log  
Energy (E) = -637.638814213 Hartree  
Enthalpy (H) = -637.294014 Hartree  
Gibbs free energy (G) = -637.345611  
Hartree

Charge = 0, Spin = 1

|   |           |           |           |
|---|-----------|-----------|-----------|
| C | 2.485894  | 1.220268  | -0.596622 |
| C | 1.138325  | 1.917281  | -0.395250 |
| C | 0.027233  | 0.997856  | 0.096097  |
| C | -0.350428 | -0.180321 | -0.829880 |
| C | 0.132248  | -1.549635 | -0.338180 |
| C | 1.651568  | -1.765370 | -0.360652 |
| C | 2.436516  | -1.052025 | 0.721788  |
| C | 2.878449  | 0.384208  | 0.599640  |
| C | 3.886994  | -0.722364 | 0.489291  |
| H | 3.256719  | 1.975061  | -0.792176 |
| H | 2.449217  | 0.588438  | -1.491802 |
| H | 0.802210  | 2.379391  | -1.330835 |
| H | 1.245277  | 2.727341  | 0.336365  |
| H | 0.278955  | 0.609656  | 1.094066  |
| H | 0.092469  | -0.008461 | -1.820382 |
| H | -0.311157 | -2.321921 | -0.977385 |
| H | -0.247844 | -1.734925 | 0.677654  |
| H | 2.037722  | -1.490535 | -1.350283 |
| H | 1.847172  | -2.840138 | -0.257530 |
| H | 2.178281  | -1.373537 | 1.729696  |
| H | 2.893039  | 0.939191  | 1.536945  |
| H | 4.596949  | -0.865215 | 1.296757  |
| H | 4.284189  | -0.934715 | -0.500564 |
| C | -1.905738 | -0.011487 | -0.966126 |
| H | -2.116152 | 0.389965  | -1.960652 |
| O | -1.141932 | 1.824557  | 0.183696  |
| N | -2.278777 | 1.015003  | 0.026036  |
| C | -2.609879 | 0.283654  | 1.254969  |
| H | -1.715275 | -0.142497 | 1.736872  |
| H | -3.100547 | 0.953760  | 1.964002  |
| C | -2.833533 | -1.199233 | -0.634063 |
| H | -3.574912 | -1.346635 | -1.422171 |
| H | -2.280130 | -2.134550 | -0.540226 |

C -3.508186 -0.819996 0.708638  
 H -4.509951 -0.421204 0.529350  
 H -3.596110 -1.666965 1.392589  
 PD9\_M062X6-311++g\*\*\_sp.log  
 E = -400246.3419909092

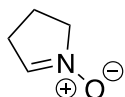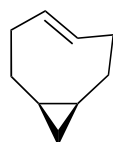

**CP9'**

CP9'\_M062X6-31G\*.log  
 Energy (E) = -637.566012131 Hartree  
 Enthalpy (H) = -637.224783 Hartree  
 Gibbs free energy (G) = -637.284573 Hartree  
 Charge = 0, Spin = 1

C -2.668407 -1.444886 -0.767376  
 C -1.363907 -2.137229 -0.277845  
 C -0.624997 -1.057035 0.463751  
 C -0.187242 0.027099 -0.176620  
 C -0.417087 1.398719 0.373361  
 C -1.884592 1.712118 -0.033162  
 C -2.936918 0.847206 0.648246  
 C -3.318956 -0.585368 0.305639  
 C -4.246621 0.545811 -0.034183  
 H -3.393464 -2.184824 -1.130393  
 H -2.405917 -0.808723 -1.621563  
 H -0.805038 -2.512499 -1.142939  
 H -1.596240 -2.992919 0.364734  
 H -0.838106 -0.970685 1.530367  
 H -0.035569 -0.012838 -1.258939  
 H 0.263457 2.138622 -0.059903  
 H -0.325374 1.413820 1.467320  
 H -1.966868 1.608459 -1.123019  
 H -2.115144 2.761736 0.189433  
 H -3.018038 1.057388 1.714435  
 H -3.612231 -1.160947 1.183741  
 H -5.177145 0.657546 0.512710  
 H -4.311086 0.820729 -1.084693  
 C 2.773169 0.892306 0.743936  
 H 2.506080 1.853887 1.160484  
 O 2.296588 1.525961 -1.429414  
 N 2.679705 0.717062 -0.539891

C 3.018178 -0.678263 -0.930641  
 H 2.071875 -1.158452 -1.193288  
 H 3.654135 -0.619151 -1.814244  
 C 3.133804 -0.366007 1.465314  
 H 3.870996 -0.211764 2.257984  
 H 2.236984 -0.805397 1.923140  
 C 3.670246 -1.258770 0.322109  
 H 4.757138 -1.162282 0.257443  
 H 3.428895 -2.313027 0.466552  
 CP9b\_M062X6-311++g\*\*\_sp.log  
 E = -400208.9439649392

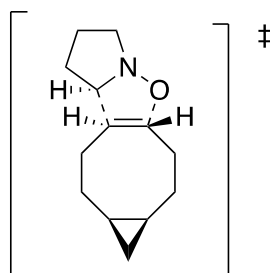

**TS9'**

TS9'\_M062X6-31G\*.log  
 Energy (E) = -637.552300780 Hartree  
 Enthalpy (H) = -637.212210 Hartree  
 Gibbs free energy (G) = -637.266419 Hartree  
 Charge = 0, Spin = 1  
 Imaginary frequency: -334.0303

C -1.732058 -1.643478 -0.756681  
 C -0.273050 -1.586222 -0.235900  
 C -0.088125 -0.248243 0.438633  
 C -0.241084 0.894910 -0.296357  
 C -1.190113 1.962365 0.146295  
 C -2.607329 1.481980 -0.252388  
 C -3.116974 0.274262 0.520467  
 C -2.738207 -1.174202 0.278426  
 C -4.103073 -0.676994 -0.106457  
 H -1.991416 -2.659017 -1.084514  
 H -1.802937 -0.998381 -1.641476  
 H 0.416271 -1.722915 -1.080906  
 H -0.091477 -2.414848 0.460935  
 H -0.465236 -0.207848 1.461618  
 H -0.117594 0.819402 -1.379875  
 H -0.973427 2.928337 -0.320961  
 H -1.130396 2.096736 1.233636  
 H -2.608134 1.258133 -1.327847  
 H -3.329542 2.297003 -0.113937



|   |           |           |           |
|---|-----------|-----------|-----------|
| H | -3.300043 | 0.498192  | 1.570966  |
| H | -2.712208 | -1.767122 | 1.192871  |
| H | -4.968580 | -1.004593 | 0.460142  |
| H | -4.290599 | -0.542634 | -1.169502 |
| C | 2.157805  | 0.004782  | 1.077131  |
| H | 1.762594  | 0.351807  | 2.020538  |
| O | 1.654849  | 1.921881  | -0.050363 |
| N | 2.377450  | 0.887794  | 0.119623  |
| C | 3.052692  | 0.273054  | -1.034487 |
| H | 2.265427  | -0.029325 | -1.737966 |
| H | 3.686337  | 1.020223  | -1.513885 |
| C | 2.956390  | -1.247516 | 0.853995  |
| H | 3.585038  | -1.510773 | 1.709681  |
| H | 2.284743  | -2.094153 | 0.670690  |
| C | 3.792582  | -0.907379 | -0.406471 |
| H | 4.798927  | -0.598809 | -0.111783 |
| H | 3.884582  | -1.752943 | -1.090110 |

TS9b\_M062X6-311++g\*\*\_sp.log  
E = -400196.6687391937

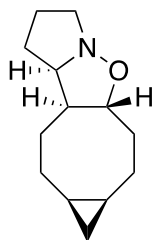

**PD9'**

PD9'\_M062X6-31G\*.log  
Energy (E) = -637.639755531 Hartree  
Enthalpy (H) = -637.294884 Hartree  
Gibbs free energy (G) = -637.346397 Hartree  
Charge = 0, Spin = 1

|   |           |           |           |
|---|-----------|-----------|-----------|
| C | -1.528029 | -1.519313 | -0.812954 |
| C | -0.094760 | -1.513341 | -0.264078 |
| C | 0.253319  | -0.254621 | 0.536679  |
| C | 0.056232  | 1.054224  | -0.260551 |
| C | -1.123211 | 1.929720  | 0.144978  |
| C | -2.496728 | 1.399177  | -0.276798 |
| C | -2.998810 | 0.212387  | 0.521985  |
| C | -2.555234 | -1.203574 | 0.250353  |
| C | -3.947080 | -0.768828 | -0.111271 |
| H | -1.738281 | -2.503362 | -1.249506 |
| H | -1.617738 | -0.800597 | -1.635891 |
| H | 0.610450  | -1.641511 | -1.096669 |
| H | 0.030529  | -2.390088 | 0.384525  |

|   |           |           |           |
|---|-----------|-----------|-----------|
| H | -0.399311 | -0.227687 | 1.416200  |
| H | -0.015310 | 0.828989  | -1.338045 |
| H | -0.962253 | 2.913837  | -0.309504 |
| H | -1.086187 | 2.075263  | 1.232435  |
| H | -2.479233 | 1.153695  | -1.346436 |
| H | -3.231124 | 2.206926  | -0.173500 |
| H | -3.184731 | 0.442814  | 1.569835  |
| H | -2.479623 | -1.836663 | 1.133966  |
| H | -4.780601 | -1.149520 | 0.469067  |
| H | -4.163069 | -0.628292 | -1.167782 |
| C | 1.733280  | -0.135284 | 1.025970  |
| H | 1.725416  | 0.154629  | 2.079812  |
| O | 1.230761  | 1.842968  | -0.017179 |
| N | 2.308794  | 0.980173  | 0.252753  |
| C | 2.844520  | 0.379412  | -0.976936 |
| H | 2.043228  | 0.092106  | -1.674651 |
| H | 3.498648  | 1.093547  | -1.481776 |
| C | 2.702602  | -1.303372 | 0.769258  |
| H | 3.326529  | -1.483342 | 1.647191  |
| H | 2.171134  | -2.233447 | 0.560650  |
| C | 3.567667  | -0.853447 | -0.438761 |
| H | 4.570057  | -0.578376 | -0.101603 |
| H | 3.671208  | -1.632715 | -1.197406 |

PD9b\_M062X6-311++g\*\*\_sp.log  
E = -400247.0622399845

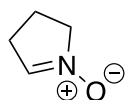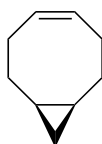

**CP10**

CP10\_M062X6-31G\*.log  
Energy (E) = -637.580374347 Hartree  
Enthalpy (H) = -637.238640 Hartree  
Gibbs free energy (G) = -637.298393 Hartree  
Charge = 0, Spin = 1

|   |           |           |           |
|---|-----------|-----------|-----------|
| C | -2.350476 | 1.521162  | 0.250042  |
| C | -0.803040 | 1.524956  | 0.127110  |
| C | -0.122768 | 0.754291  | 1.229348  |
| C | -0.097468 | -0.576639 | 1.345810  |
| C | -0.750778 | -1.547197 | 0.391871  |
| C | -2.298081 | -1.593112 | 0.520576  |
| C | -2.995034 | -0.891821 | -0.626551 |

C -3.018723 0.607465 -0.756658  
 C -4.282005 -0.139091 -0.425560  
 H -2.739386 2.535221 0.101067  
 H -2.639693 1.232278 1.266842  
 H -0.414023 2.544350 0.126928  
 H -0.523223 1.098358 -0.846022  
 H 0.356627 1.348812 2.005950  
 H 0.384172 -1.009019 2.223182  
 H -0.335434 -2.546447 0.561434  
 H -0.498577 -1.275386 -0.643224  
 H -2.596457 -1.143637 1.473844  
 H -2.643457 -2.633196 0.551058  
 H -2.908911 -1.425812 -1.571636  
 H -2.945647 0.970983 -1.780332  
 H -5.063457 -0.218335 -1.173968  
 H -4.645790 -0.055484 0.595481  
 C 2.139286 -0.073908 -1.274181  
 H 1.490745 0.205556 -2.093467  
 O 2.144377 2.043843 -0.343193  
 N 2.476322 0.830577 -0.404043  
 C 3.318156 0.264689 0.682280  
 H 4.128427 0.971985 0.860828  
 H 2.673846 0.220852 1.564270  
 C 2.678259 -1.426887 -0.933765  
 H 1.883141 -2.072274 -0.537409  
 H 3.111668 -1.940166 -1.797133  
 C 3.737659 -1.103067 0.147679  
 H 3.779700 -1.861657 0.931011  
 H 4.726541 -1.036814 -0.312867  
 CP10\_M062X6-311++g\*\*\_sp.log  
 E = -400218.36565924087

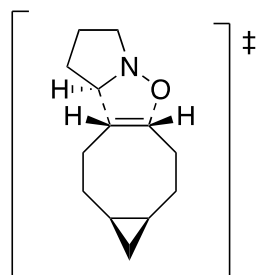

**TS10**

TS10\_M062X6-31G\*.log  
 Energy (E) = -637.556768835 Hartree  
 Enthalpy (H) = -637.215937 Hartree  
 Gibbs free energy (G) = -637.269919  
 Hartree  
 Charge = 0, Spin = 1

Imaginary frequency: -447.4597  
 C -2.473024 1.463199 0.362281  
 C -1.054253 1.635913 -0.239531  
 C 0.006597 0.936664 0.567155  
 C 0.240077 -0.427132 0.539095  
 C -0.627616 -1.415064 -0.214263  
 C -2.023111 -1.633696 0.425607  
 C -3.130276 -0.991974 -0.384971  
 C -3.339686 0.498546 -0.421271  
 C -4.344756 -0.387333 0.263989  
 H -2.986932 2.431187 0.397155  
 H -2.393120 1.128617 1.403633  
 H -0.789089 2.694997 -0.302360  
 H -1.042224 1.257930 -1.269016  
 H 0.358799 1.487902 1.436638  
 H 0.745832 -0.848407 1.410549  
 H -0.093087 -2.371502 -0.282190  
 H -0.775389 -1.076801 -1.248662  
 H -2.023383 -1.233371 1.445596  
 H -2.238893 -2.705095 0.517798  
 H -3.311087 -1.493601 -1.334457  
 H -3.643426 0.886040 -1.392295  
 H -5.318007 -0.537642 -0.191410  
 H -4.357712 -0.361013 1.350802  
 C 2.002762 -0.498931 -0.772166  
 H 1.358875 -0.622134 -1.634187  
 O 1.608198 1.720855 -0.553514  
 N 2.413014 0.729619 -0.470544  
 C 3.414016 0.695160 0.603479  
 H 4.070041 1.562173 0.517271  
 H 2.864808 0.756802 1.554465  
 C 2.992300 -1.524165 -0.287308  
 H 2.512351 -2.200053 0.429891  
 H 3.393941 -2.143065 -1.094816  
 C 4.089551 -0.659133 0.387669  
 H 4.455901 -1.094677 1.318635  
 H 4.939643 -0.544780 -0.289716  
 TS10\_M062X6-311++g\*\*\_sp.log  
 E = -400199.30343217263

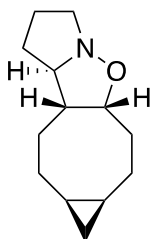

**PD10**

PD10\_M062X6-31G\*.log  
 Energy (E) = -637.630932989 Hartree  
 Enthalpy (H) = -637.286227 Hartree  
 Gibbs free energy (G) = -637.338970 Hartree

Charge = 0, Spin = 1

|   |           |           |           |
|---|-----------|-----------|-----------|
| C | -2.340421 | 1.425475  | 0.356931  |
| C | -1.027617 | 1.629672  | -0.428780 |
| C | 0.211584  | 1.043370  | 0.243768  |
| C | 0.507340  | -0.477359 | 0.123494  |
| C | -0.558204 | -1.400676 | -0.465485 |
| C | -1.820092 | -1.581684 | 0.407501  |
| C | -3.060881 | -1.026361 | -0.255065 |
| C | -3.305319 | 0.457327  | -0.293735 |
| C | -4.184539 | -0.430295 | 0.545313  |
| H | -2.851261 | 2.387336  | 0.476082  |
| H | -2.114336 | 1.090819  | 1.377277  |
| H | -0.817568 | 2.698700  | -0.535669 |
| H | -1.117233 | 1.234078  | -1.447200 |
| H | 0.188223  | 1.325671  | 1.306788  |
| H | 0.747032  | -0.854626 | 1.126993  |
| H | -0.077663 | -2.373879 | -0.630312 |
| H | -0.846147 | -1.038581 | -1.460479 |
| H | -1.672709 | -1.098888 | 1.381302  |
| H | -1.980357 | -2.643396 | 0.626571  |
| H | -3.356081 | -1.567233 | -1.152375 |
| H | -3.748883 | 0.831187  | -1.214375 |
| H | -5.206108 | -0.610920 | 0.228538  |
| H | -4.052494 | -0.376799 | 1.623174  |
| C | 1.802193  | -0.499454 | -0.720675 |
| H | 1.543026  | -0.600736 | -1.780863 |
| O | 1.334191  | 1.705268  | -0.383335 |
| N | 2.415306  | 0.813717  | -0.503448 |
| C | 3.161750  | 0.684605  | 0.756423  |
| H | 3.837513  | 1.533618  | 0.877237  |
| H | 2.486705  | 0.652571  | 1.625977  |
| C | 2.865234  | -1.506810 | -0.258269 |
| H | 2.408911  | -2.295488 | 0.347911  |
| H | 3.357302  | -1.991577 | -1.103969 |

|   |          |           |           |
|---|----------|-----------|-----------|
| C | 3.874190 | -0.654274 | 0.560041  |
| H | 4.151799 | -1.118222 | 1.508688  |
| H | 4.788346 | -0.503017 | -0.019244 |

PD10\_M062X6-311++g\*\*\_sp.log  
 E = -400242.03307301225

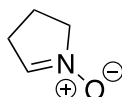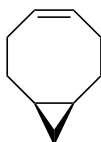

**CP10'**

CP10'\_M062X6-31G\*.log  
 Energy (E) = -637.583248445 Hartree  
 Enthalpy (H) = -637.240951 Hartree  
 Gibbs free energy (G) = -637.299051 Hartree

Charge = 0, Spin = 1

|   |           |           |           |
|---|-----------|-----------|-----------|
| C | 1.718170  | -0.901239 | 1.196692  |
| C | 1.039298  | -2.081422 | 0.505749  |
| C | 0.187823  | -1.890686 | -0.728038 |
| C | -0.023134 | -0.933783 | -1.643257 |
| C | 0.489469  | 0.455995  | -1.939987 |
| C | 1.250614  | 1.270031  | -0.895489 |
| C | 2.638379  | 0.741791  | -0.626845 |
| C | 2.867152  | -0.327091 | 0.404139  |
| C | 3.331229  | 1.078801  | 0.663714  |
| H | 2.107987  | -1.261885 | 2.157365  |
| H | 0.980136  | -0.129263 | 1.443031  |
| H | 0.404026  | -2.593414 | 1.242737  |
| H | 1.805793  | -2.828034 | 0.244501  |
| H | -0.376801 | -2.803932 | -0.932885 |
| H | -0.718539 | -1.246451 | -2.427039 |
| H | -0.381391 | 1.040607  | -2.268118 |
| H | 1.116884  | 0.369637  | -2.841516 |
| H | 0.679965  | 1.343379  | 0.037162  |
| H | 1.339067  | 2.295891  | -1.277590 |
| H | 3.273914  | 0.689217  | -1.509620 |
| H | 3.647877  | -1.048580 | 0.167436  |
| H | 4.394941  | 1.290935  | 0.647478  |
| H | 2.762701  | 1.656102  | 1.388637  |
| C | -2.112677 | 1.356923  | -0.140785 |
| H | -1.749953 | 2.337214  | -0.421409 |
| O | -0.846630 | 1.296071  | 1.789731  |
| N | -1.676061 | 0.825573  | 0.958095  |

C -2.274409 -0.506620 1.222556  
 H -1.439826 -1.197988 1.351339  
 H -2.811234 -0.420076 2.169750  
 C -3.087745 0.492737 -0.868096  
 H -4.064620 0.981200 -0.958853  
 H -2.744712 0.274754 -1.886229  
 C -3.154131 -0.793611 0.001497  
 H -4.180425 -1.022554 0.292946  
 H -2.760560 -1.645282 -0.554750  
 CP10b\_M062X6-311++g\*\*\_sp.log  
 E = -400219.04175294755

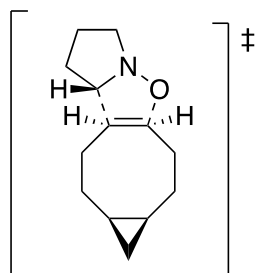

### TS10'

TS10'\_M062X6-31G\*.log  
 Energy (E) = -637.551342878 Hartree  
 Enthalpy (H) = -637.210354 Hartree  
 Gibbs free energy (G) = -637.264303  
 Hartree  
 Charge = 0, Spin = 1  
 Imaginary frequency: -494.3642

C 2.031900 1.388113 -0.474382  
 C 1.149231 1.855353 0.687397  
 C -0.055641 1.026009 1.062051  
 C -0.299732 -0.342095 1.125509  
 C 0.597755 -1.563479 0.959664  
 C 1.629105 -1.640908 -0.175154  
 C 2.953931 -0.993152 0.146514  
 C 3.155429 0.484404 -0.025469  
 C 3.820502 -0.476493 -0.969846  
 H 2.473705 2.268449 -0.956599  
 H 1.404051 0.913346 -1.235767  
 H 0.758043 2.849416 0.449721  
 H 1.776391 1.982093 1.583348  
 H -0.744868 1.611297 1.669686  
 H -1.113870 -0.582720 1.814111  
 H -0.079030 -2.423375 0.853449  
 H 1.128712 -1.738133 1.907117  
 H 1.230537 -1.212145 -1.101125  
 H 1.815267 -2.699553 -0.396332

H 3.475428 -1.449681 0.985836  
 H 3.815519 0.948517 0.705646  
 H 4.894921 -0.612346 -0.907450  
 H 3.417031 -0.542508 -1.977343  
 C -1.583237 -0.617504 -0.616236  
 H -0.735884 -0.907097 -1.222747  
 O -1.125264 1.598503 -0.650837  
 N -1.987661 0.651195 -0.673845  
 C -3.264614 0.820309 0.031437  
 H -3.026741 1.043798 1.081973  
 H -3.807429 1.664806 -0.394853  
 C -2.737544 -1.526360 -0.288201  
 H -2.913775 -2.286484 -1.054510  
 H -2.542350 -2.055344 0.652548  
 C -3.929884 -0.543271 -0.152420  
 H -4.518821 -0.546543 -1.073185  
 H -4.594302 -0.797736 0.674912  
 TS10b\_M062X6-311++g\*\*\_sp.log  
 E = -400195.7578519528

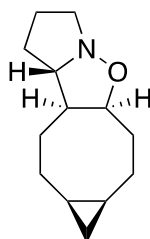

### PD10'

PD10'\_M062X6-31G\*.log  
 Energy (E) = -637.630883423 Hartree  
 Enthalpy (H) = -637.286264 Hartree  
 Gibbs free energy (G) = -637.338312  
 Hartree  
 Charge = 0, Spin = 1

C 2.137329 1.492042 0.122160  
 C 1.060674 1.445095 1.229920  
 C -0.299422 0.837892 0.841815  
 C -0.548459 -0.676802 0.982332  
 C 0.647200 -1.605346 0.768451  
 C 1.420937 -1.410957 -0.556160  
 C 2.851552 -1.021881 -0.263234  
 C 3.179112 0.391021 0.137739  
 C 3.675799 -0.163063 -1.174603  
 H 2.672715 2.444037 0.212508  
 H 1.638554 1.523821 -0.849471  
 H 0.862064 2.473130 1.548506  
 H 1.440212 0.920227 2.115642

H -1.071823 1.338574 1.450288  
 H -0.943164 -0.871800 1.987097  
 H 0.278504 -2.635178 0.849235  
 H 1.342629 -1.471343 1.606632  
 H 0.939180 -0.642951 -1.171345  
 H 1.406171 -2.333356 -1.147345  
 H 3.405541 -1.787381 0.278522  
 H 3.924454 0.491505 0.924470  
 H 4.730566 -0.389739 -1.288701  
 H 3.197244 0.217218 -2.073289  
 C -1.673676 -0.883615 -0.054961  
 H -1.463942 -1.766991 -0.668469  
 O -0.553121 1.118660 -0.534317  
 N -1.648035 0.317203 -0.945895  
 C -2.910599 1.049923 -0.754388  
 H -2.840692 1.738173 0.101299  
 H -3.140591 1.632721 -1.649397  
 C -3.103958 -0.938479 0.509798  
 H -3.481000 -1.959946 0.601422  
 H -3.125403 -0.483878 1.508528  
 C -3.907959 -0.064842 -0.459772  
 H -4.135824 -0.616624 -1.377649  
 H -4.845362 0.304147 -0.037259  
 PD10b\_M062X6-311++g\*\*\_sp.log  
 E = -400240.08586430154

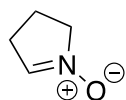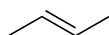

### CP11

CP11\_M062X6-31G\*.log  
 Energy (E) = -443.549537657 Hartree  
 Enthalpy (H) = -443.313256 Hartree  
 Gibbs free energy (G) = -443.365003 Hartree  
 Charge = 0, Spin = 1  
 C 1.880732 2.079031 -0.465058  
 C 1.939903 0.796105 0.312937  
 C 1.931204 -0.424267 -0.223037  
 C 1.970543 -1.705949 0.552155  
 H 1.851339 1.885379 -1.542049  
 H 0.993513 2.669137 -0.200252  
 H 1.998148 0.888543 1.399269  
 H 1.869896 -0.524612 -1.308342  
 H 1.099688 -2.317911 0.290036

H 1.976872 -1.516896 1.630314  
 C -1.227680 -0.707279 0.950203  
 H -1.034712 -1.548320 1.602192  
 O -0.824284 -1.909004 -0.985988  
 N -1.131176 -0.873366 -0.334289  
 C -1.359344 0.395273 -1.075086  
 H -0.380299 0.706371 -1.449361  
 H -2.009445 0.161217 -1.918536  
 C -1.508551 0.712834 1.324007  
 H -2.277343 0.806156 2.096378  
 H -0.598619 1.194071 1.706765  
 C -1.950591 1.332288 -0.023771  
 H -3.041450 1.328493 -0.091334  
 H -1.608876 2.361944 -0.143458  
 H 2.751517 2.711987 -0.260406  
 H 2.864981 -2.288189 0.302617  
 CP11\_M062X6-311++g\*\*\_sp.log  
 E = -278428.2740988875

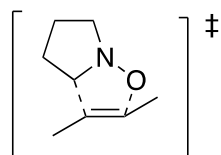

### TS11

TS11\_M062X6-31G\*.log  
 Energy (E) = -443.519808728 Hartree  
 Enthalpy (H) = -443.284340 Hartree  
 Gibbs free energy (G) = -443.331863 Hartree  
 Charge = 0, Spin = 1  
 Imaginary frequency: -479.99  
 C 0.204483 2.119783 -0.643033  
 C 0.979963 1.130924 0.197393  
 C 1.805966 0.187151 -0.391958  
 C 2.977958 -0.409091 0.332145  
 H -0.015984 1.703394 -1.632710  
 H -0.746333 2.422549 -0.189243  
 H 1.260349 1.481468 1.191115  
 H 1.829702 0.132577 -1.478644  
 H 3.188871 -1.418853 -0.026883  
 H 2.771482 -0.470611 1.406146  
 C -0.512046 -0.237786 1.048553  
 H 0.109588 -0.429783 1.914554  
 O 0.702269 -1.569323 -0.312827  
 N -0.438258 -1.107644 0.043643  
 C -1.477545 -0.878311 -0.968368

H -0.981847 -0.428360 -1.836396  
H -1.896098 -1.840198 -1.272964  
C -1.885444 0.359851 1.123866  
H -2.474280 -0.101729 1.924601  
H -1.844538 1.431780 1.337913  
C -2.483734 0.060697 -0.279528  
H -3.470596 -0.398072 -0.196823  
H -2.596905 0.982164 -0.854557  
H 0.780353 3.039734 -0.801768  
H 3.878276 0.202721 0.198356  
TS11\_M062X6-311++g\*\*\_sp.log  
E = -278405.29166248185

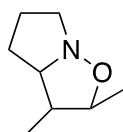

#### PD11

PD11\_M062X6-31G\*.log  
Energy (E) = -443.599163409 Hartree  
Enthalpy (H) = -443.360212 Hartree  
Gibbs free energy (G) = -443.404500 Hartree  
Charge = 0, Spin = 1  
C 1.408226 2.060609 -0.163759  
C 0.972113 0.751607 0.479202  
C 1.240103 -0.507845 -0.341572  
C 2.678196 -0.978659 -0.380813  
H 0.988691 2.178856 -1.167725  
H 1.092817 2.919927 0.436187  
H 1.497585 0.623068 1.434064  
H 0.859021 -0.361187 -1.369681  
H 2.757586 -1.926599 -0.918724  
H 3.047610 -1.125847 0.638102  
C -0.533794 0.596797 0.744197  
H -0.792890 0.966490 1.741865  
O 0.469037 -1.493632 0.333034  
N -0.765513 -0.883327 0.713993  
C -1.782069 -1.155696 -0.318672  
H -1.297495 -1.338677 -1.288610  
H -2.361133 -2.042422 -0.049355  
C -1.493998 1.189139 -0.298785  
H -1.847286 2.187223 -0.027291  
H -1.006507 1.259945 -1.278795  
C -2.599940 0.131670 -0.371172  
H -3.255292 0.200558 0.503765  
H -3.216916 0.204899 -1.269843

H 2.498324 2.101310 -0.252380  
H 3.309161 -0.240926 -0.885548  
PD11\_M062X6-311++g\*\*\_sp.log  
E = -278451.4702746118

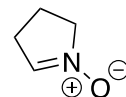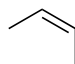

#### CP12

CP12\_M062X6-31G\*.log  
Energy (E) = -443.546106196 Hartree  
Enthalpy (H) = -443.309586 Hartree  
Gibbs free energy (G) = -443.364184 Hartree  
Charge = 0, Spin = 1  
C 1.780649 -0.433028 1.023743  
C 2.084705 0.777531 0.547417  
H 1.549445 -0.505183 2.087420  
H 2.082382 1.613378 1.247489  
C -0.974394 0.400758 -1.127535  
H -0.601436 0.308699 -2.138639  
O -1.295986 -1.877373 -0.875888  
N -1.319610 -0.677016 -0.489307  
C -1.747881 -0.383794 0.903580  
H -2.650743 -0.966723 1.087491  
H -0.947529 -0.751207 1.551883  
C -1.128272 1.637140 -0.302588  
H -0.149184 2.032813 -0.006708  
H -1.655720 2.432597 -0.837694  
C -1.923996 1.133921 0.928301  
H -1.563500 1.575515 1.858756  
H -2.980575 1.390076 0.820061  
C 1.742363 -1.730360 0.269709  
H 2.371246 -2.475060 0.770128  
H 0.725838 -2.138642 0.216703  
H 2.098636 -1.627007 -0.757144  
C 2.448184 1.126175 -0.867303  
H 2.404014 0.263401 -1.534410  
H 1.773401 1.892898 -1.268163  
H 3.460726 1.542489 -0.916861  
CP12\_M062X6-311++g\*\*\_sp.log  
E = -278426.6378584049

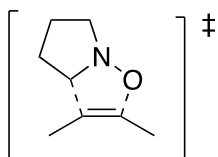

### TS12

TS12\_M062X6-31G\*.log  
 Energy (E) = -443.520485644 Hartree  
 Enthalpy (H) = -443.285077 Hartree  
 Gibbs free energy (G) = -443.331824 Hartree  
 Charge = 0, Spin = 1  
 Imaginary frequency: -478.1151  
 C 1.596139 -0.493042 0.667956  
 C 1.028064 0.768883 0.674382  
 H 1.370794 -1.159333 1.495713  
 H 0.392306 1.013894 1.526619  
 C -0.605103 0.465885 -0.738703  
 H 0.041488 0.746875 -1.561662  
 O 0.257531 -1.615154 -0.523850  
 N -0.752332 -0.830616 -0.478195  
 C -1.791626 -1.041115 0.537724  
 H -2.237764 -2.027303 0.403519  
 H -1.293140 -1.006225 1.517544  
 C -1.822836 1.237638 -0.306789  
 H -1.545466 1.992343 0.438384  
 H -2.308604 1.764152 -1.133368  
 C -2.734916 0.138848 0.301456  
 H -3.231873 0.463594 1.217004  
 H -3.506283 -0.142632 -0.419839  
 C 2.791386 -0.854459 -0.166646  
 H 3.715171 -0.430913 0.247734  
 H 2.903605 -1.939013 -0.225127  
 H 2.678547 -0.483109 -1.189823  
 C 1.661334 1.961330 -0.006343  
 H 2.118660 1.685795 -0.962085  
 H 0.924497 2.748134 -0.207966  
 H 2.449500 2.405477 0.613296  
 TS12\_M062X6-311++g\*\*\_sp.log  
 E = -278406.36350541026

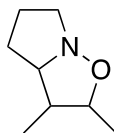

### PD12

PD12\_M062X6-31G\*.log  
 Energy (E) = -443.596387368 Hartree  
 Enthalpy (H) = -443.357193 Hartree  
 Gibbs free energy (G) = -443.403194 Hartree  
 Charge = 0, Spin = 1  
 C 1.420685 -0.637260 0.469192  
 C 0.686922 0.712773 0.483745  
 H 1.671109 -0.952787 1.489426  
 H 0.165888 0.812435 1.444601  
 C -0.373071 0.495925 -0.607564  
 H 0.063947 0.701077 -1.592836  
 O 0.477993 -1.590121 -0.065674  
 N -0.701094 -0.933896 -0.508838  
 C -1.752338 -1.022959 0.513672  
 H -2.219366 -2.009558 0.480948  
 H -1.346066 -0.865341 1.524510  
 C -1.708005 1.225787 -0.379919  
 H -1.585793 2.006950 0.377600  
 H -2.070698 1.709806 -1.288897  
 C -2.679890 0.116889 0.099019  
 H -3.331528 0.443213 0.912143  
 H -3.311990 -0.208710 -0.731165  
 C 2.667272 -0.689363 -0.401000  
 H 3.465075 -0.059895 0.005618  
 H 3.028662 -1.719302 -0.452944  
 H 2.440748 -0.360000 -1.420250  
 C 1.544360 1.952772 0.271285  
 H 2.046095 1.927830 -0.700984  
 H 0.921549 2.853052 0.302254  
 H 2.310471 2.052082 1.046662  
 PD12\_M062X6-311++g\*\*\_sp.log  
 E = -278449.8586526015

### 3. Calculated barriers and distortion energies for selected reactions of nitrones with dipolarophiles (Acetonitrile data)

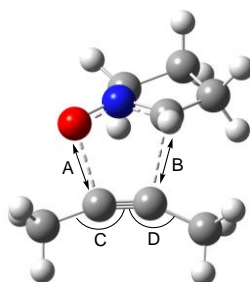

| Entry | Nitrone | Dipolarophile | k2 (M <sup>-1</sup> s <sup>-1</sup> ) | $\Delta G^\ddagger$ (kcal/mol) | Dis_Nitron        | Dis_total | C-O distance A (Å) | CCC angle_C (°)  | CCC angle_D (°)  |
|-------|---------|---------------|---------------------------------------|--------------------------------|-------------------|-----------|--------------------|------------------|------------------|
|       |         |               |                                       | $\Delta E^\ddagger$ (kcal/mol) | Dis_Dipolarophile | Int       | C-C distance B (Å) | $\Delta$ angle_C | $\Delta$ angle_D |
| 1     | 1a      | 2a            | 1.95                                  | 23.0                           | 9.5               | 12.8      | 2.13               | 156.48           | 149.23           |
|       |         |               |                                       | 9.9                            | 3.3               | -2.9      | 2.26               | -1.72            | -8.79            |
| 2     | 1b      | 2a            | N/A                                   | 21.3                           | 7.7               | 10.5      | 2.16               | 157.03           | 149.68           |
|       |         |               |                                       | 8.0                            | 2.8               | -2.5      | 2.31               | -1.17            | -8.34            |
| 3     | 1c      | 2a            | N/A                                   | 22.0                           | 8.5               | 11.6      | 2.12               | 155.80           | 150.33           |
|       |         |               |                                       | 9.0                            | 3.1               | -2.7      | 2.29               | -2.41            | -7.70            |
| 4     | 1d      | 2a            | 1.5                                   | 22.1                           | 8.7               | 11.9      | 2.10               | 155.57           | 149.92           |
|       |         |               |                                       | 8.7                            | 3.2               | -3.2      | 2.31               | -2.63            | -8.11            |
| 5     | 1a      | 2b            | N/A                                   | 35.3                           | 12.8              | 24.9      | 2.08               | 161.15           | 153.43           |
|       |         |               |                                       | 20.5                           | 12.1              | -4.4      | 2.21               | -18.85           | -26.55           |
| 6     | 1a      | 2c            | 41.7                                  | 12.6                           | 3.8               | 5.4       | 2.20               | 150.46           | 142.38           |
|       |         |               |                                       | -1.6                           | 1.6               | -7.0      | 2.46               | -5.35            | -9.52            |
| 7     | 1a      | 2c            | 39.9                                  | 13.3                           | 4.7               | 6.6       | 2.24               | 145.84           | 143.06           |
|       |         |               |                                       | -0.3                           | 1.9               | -6.9      | 2.41               | -12.75           | -8.84            |
| 8     | 1a      | 2d            | 0.05                                  | 20.7                           | 7.3               | 9.5       | 2.17               | 154.49           | 147.00           |
|       |         |               |                                       | 7.4                            | 2.3               | -2.1      | 2.33               | -0.29            | -7.70            |
| 9     | 1a      | 2d            | 0.05                                  | 20.8                           | 7.3               | 9.7       | 2.16               | 154.42           | 146.83           |
|       |         |               |                                       | 7.6                            | 2.4               | -2.2      | 2.34               | -0.36            | -7.88            |
| 10    | 1a      | 2e            | 0.08                                  | 22.0                           | 7.8               | 10.3      | 2.15               |                  |                  |
|       |         |               |                                       | 8.3                            | 2.6               | -2.1      | 2.37               |                  |                  |
| 11    | 1a      | 2e            | 0.08                                  | 22.2                           | 8.0               | 10.6      | 2.17               |                  |                  |
|       |         |               |                                       | 8.5                            | 2.6               | -2.1      | 2.35               |                  |                  |
| 12    | 1a      | 2f            | N/A                                   | 29.0                           | 13.3              | 19.3      | 2.11               |                  |                  |
|       |         |               |                                       | 14.4                           | 6.0               | -4.9      | 2.20               |                  |                  |
| 13    | 1a      | 2f            | N/A                                   | 32.6                           | 14.9              | 23.9      | 2.10               |                  |                  |
|       |         |               |                                       | 18.0                           | 8.9               | -5.9      | 2.18               |                  |                  |
| 14    | 1a      | 2g            | N/A                                   | 32.0                           | 15.0              | 24.6      | 2.08               |                  |                  |
|       |         |               |                                       | 18.1                           | 9.7               | -6.5      | 2.20               |                  |                  |
| 15    | 1a      | 2h            | N/A                                   | 30.7                           | 13.8              | 21.6      | 2.11               |                  |                  |
|       |         |               |                                       | 16.2                           | 7.8               | -5.4      | 2.18               |                  |                  |

Geometry optimizations were carried out at the M06-2X level of theory with the 6-31G(d) basis set. Solvent effects in acetonitrile were evaluated at the M06-2X/6-311++G(d,p) level at 298.15K with a self-consistent reaction field (SCRF) using the SMD model on the gas-phase-optimized structures. Dis\_Nitron is the distortion energy for the nitrones shown, Dis\_Dipolarophile is the distortion energy for the different dipolarophiles shown, Dis\_total refers to the total distortion energy, and Int represents the interaction energy for the given reaction. The C-O and C-C bond distances are for the bond lengths at the transition states for the bonds forming in the reactions. The bond angles represent those in the illustration above the table.
